# Supplementary material
Source: PubMed Central journal article supplement (PMC9018011)

# MetProc: separating measurement artifacts from true metabolites in an untargeted metabolomics experiment.

*Mark D. Chaffin<sup>1,2,†</sup>, Liu Cao<sup>1,2,17,†</sup>, Amy A. Deik<sup>3</sup>, Clary B. Clish<sup>3</sup>, Frank B. Hu<sup>1,4</sup>, Miguel A. Martínez-González<sup>4,5,6</sup>, Cristina Razquin<sup>5,6</sup>, Monica Bullo<sup>6,7</sup>, Dolores Corella<sup>6,8</sup>, Enrique Gómez-Gracia<sup>6,9</sup>, Miquel Fiol<sup>6,10</sup>, Ramon Estruch<sup>6,11</sup>, José Lapetra<sup>6,12</sup>, Montserrat Fitó<sup>6,13</sup>, Fernando Arós<sup>6,14</sup>, Lluís Serra-Majem<sup>6,15</sup>, Emilio Ros<sup>5,16</sup>, and Liming Liang<sup>1,2,\*</sup>*

\*Contact E-mail for Corresponding Author: [lliang@hsph.harvard.edu](mailto:lliang@hsph.harvard.edu)

† These authors contributed the same

<sup>1</sup>Department of Epidemiology, Harvard TH Chan School of Public Health, Boston, MA 02115, USA,

<sup>2</sup>Department of Biostatistics, Harvard TH Chan School of Public Health, Boston, MA 02115, USA,

<sup>3</sup>Metabolomics Platform, Broad Institute of MIT and Harvard, Cambridge, MA 02142, USA,

<sup>4</sup>Department of Nutrition, Harvard TH Chan School of Public Health, Boston, MA 02115, USA,

<sup>5</sup>Department of Preventive Medicine and Public Health, School of Medicine, University of Navarra, 31009 Pamplona, Spain,

<sup>6</sup>Ciber Fisiopatología de la Obesidad y Nutrición (CIBEROBN), Instituto de Salud Carlos III (ISCIII), 28029 Madrid, Spain,

<sup>7</sup>Human Nutrition Department, Hospital Universitari Sant Joan, Institut d'Investigació Sanitària Pere Virgili, Universitat Rovira i Virgili, E-43204 Reus, Spain,

<sup>8</sup>Department of Preventive Medicine, University of Valencia, 46010 Valencia, Spain,

<sup>9</sup>Department of Preventive Medicine, University of Malaga, 29071 Malaga, Spain,

<sup>10</sup>Institute of Health Sciences, Instituto de Investigación Sanitaria de Palma, 07120 Palma de Mallorca, Spain,

<sup>11</sup>Department of Internal Medicine, IDIBAPS, Hospital Clínic, 08036 Barcelona, Spain,

<sup>12</sup>Department of Family Medicine, Primary Care Division of Sevilla, San Pablo Health Center, 41007 Sevilla, Spain,

<sup>13</sup>Cardiovascular and Nutrition Research Group, IMIM, Institut de Recerca Hospital del Mar, Parc de Salut Mar, 08003 Barcelona, Spain,

<sup>14</sup>Department of Cardiology, University Hospital of Alava, 01009 Vitoria, Spain,

<sup>15</sup>Research Institute of Biomedical and Health Sciences, University of Las Palmas de Gran Canaria, 35016 Las Palmas, Spain,

<sup>16</sup>Lipid Clinic, Endocrinology and Nutrition Service, Hospital Clínic, Institut d'Investigacions Biomèdiques August Pi i Sunyer (IDIBAPS), 08036 Barcelona, Spain,

<sup>17</sup>Computational Biology Department, School of Computer Science, Carnegie Mellon University, Pittsburgh, PA 15213

## Table of content

**Figure S1.** Panel 1-20. We randomly took 20 metabolic features MetProc had determined to reject, and inserted those m/z and retention times into a targeted software program called Trace Finder (Thermo Fisher Scientific; Waltham, MA). We were able to visually inspect every PREDIMED sample and confirm the abundance of each rejected metabolite, in comparison to MetProc.

# a. Total Ion Chromatograms

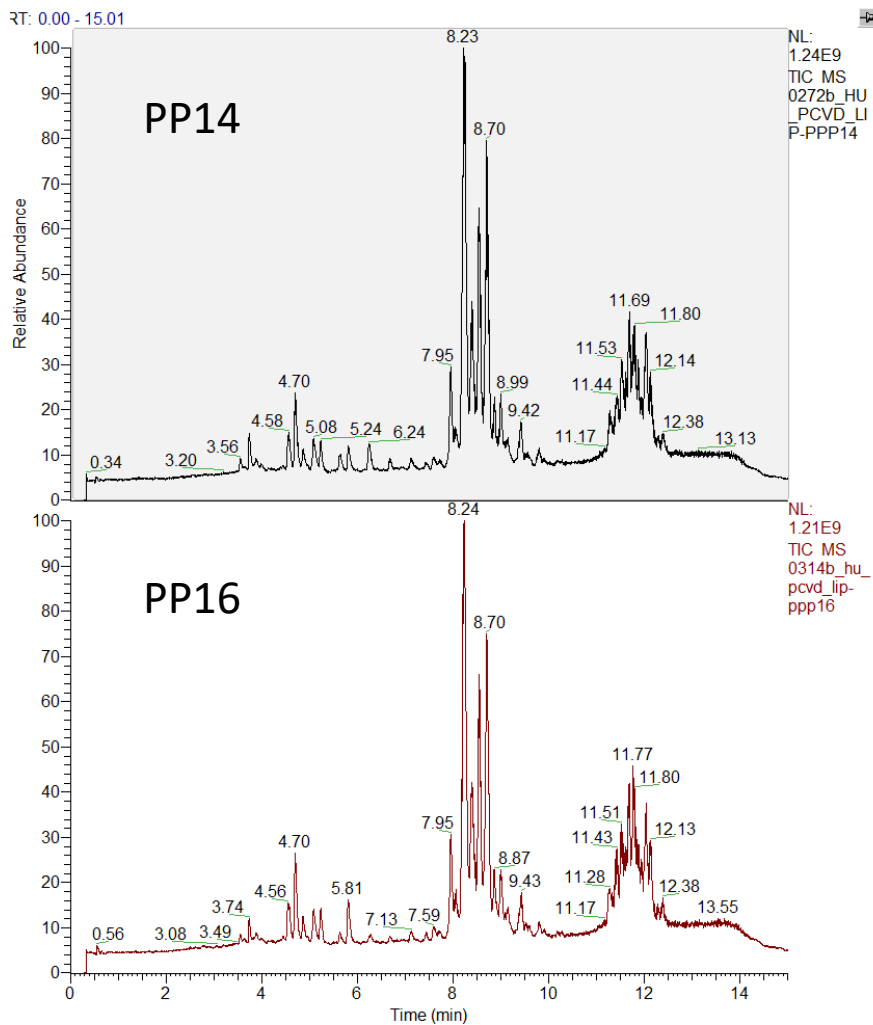

# b. Extracted Ion Chromatograms

Q1569 m/z 235.1802; RT 3.74

Matches missingness pattern of MetProc

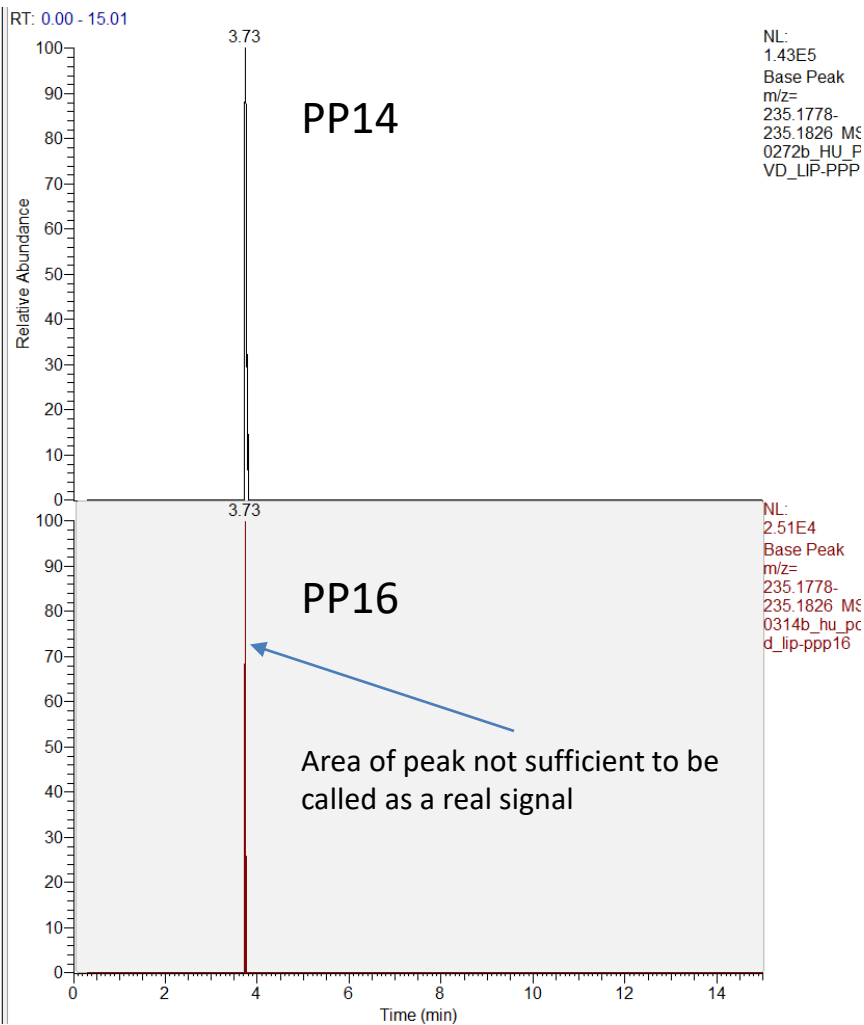

# a. Total Ion Chromatograms

# b. Extracted Ion Chromatograms

Q1642 m/z 250.0858; RT 4.6

Matches missingness pattern of MetProc

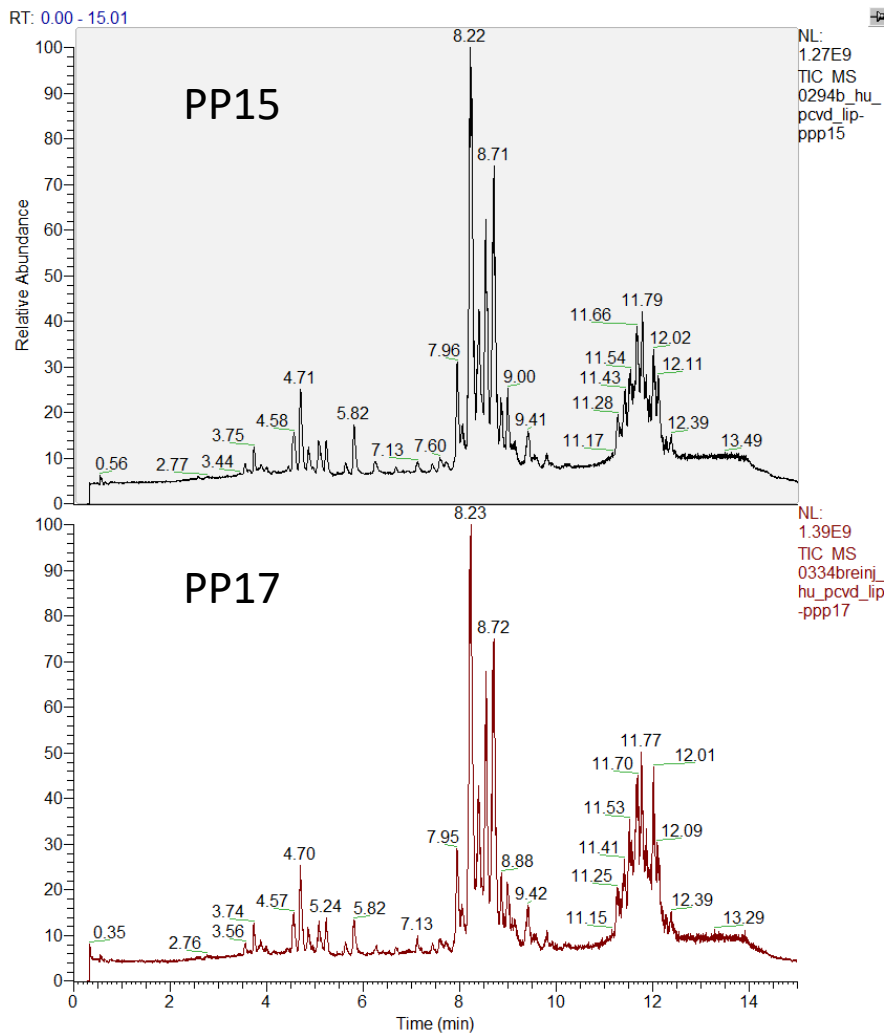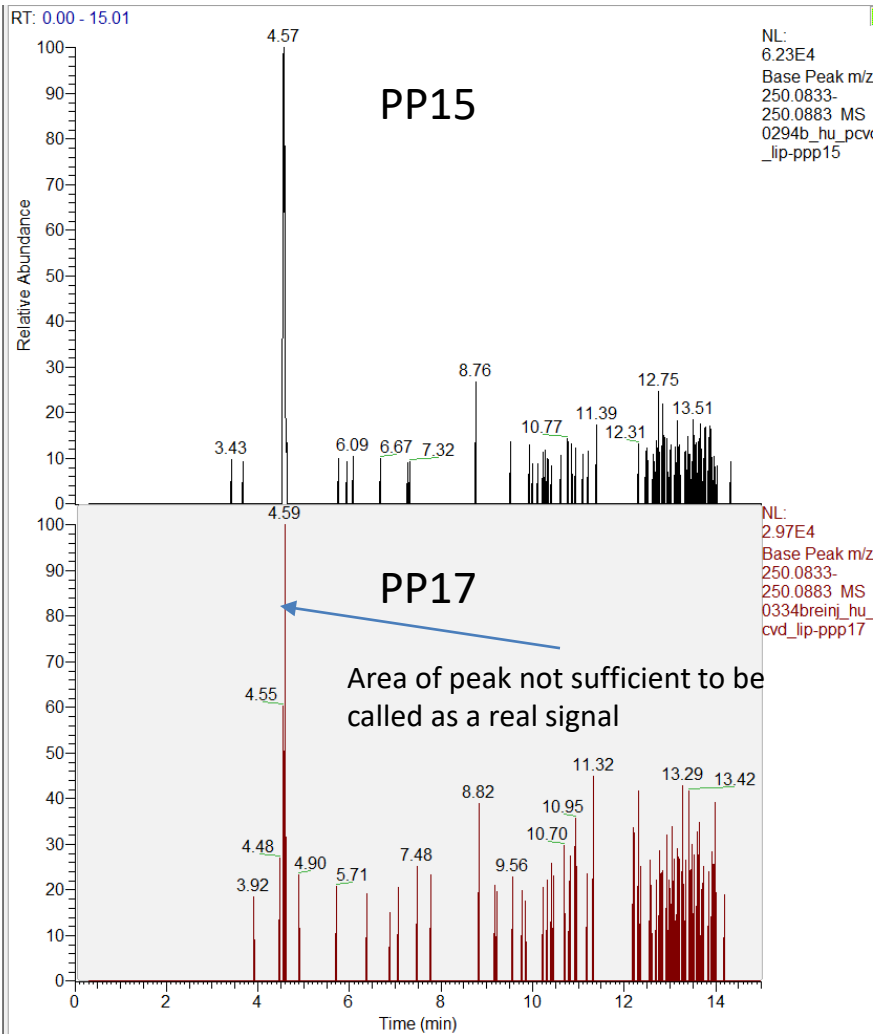

### a. Total Ion Chromatograms

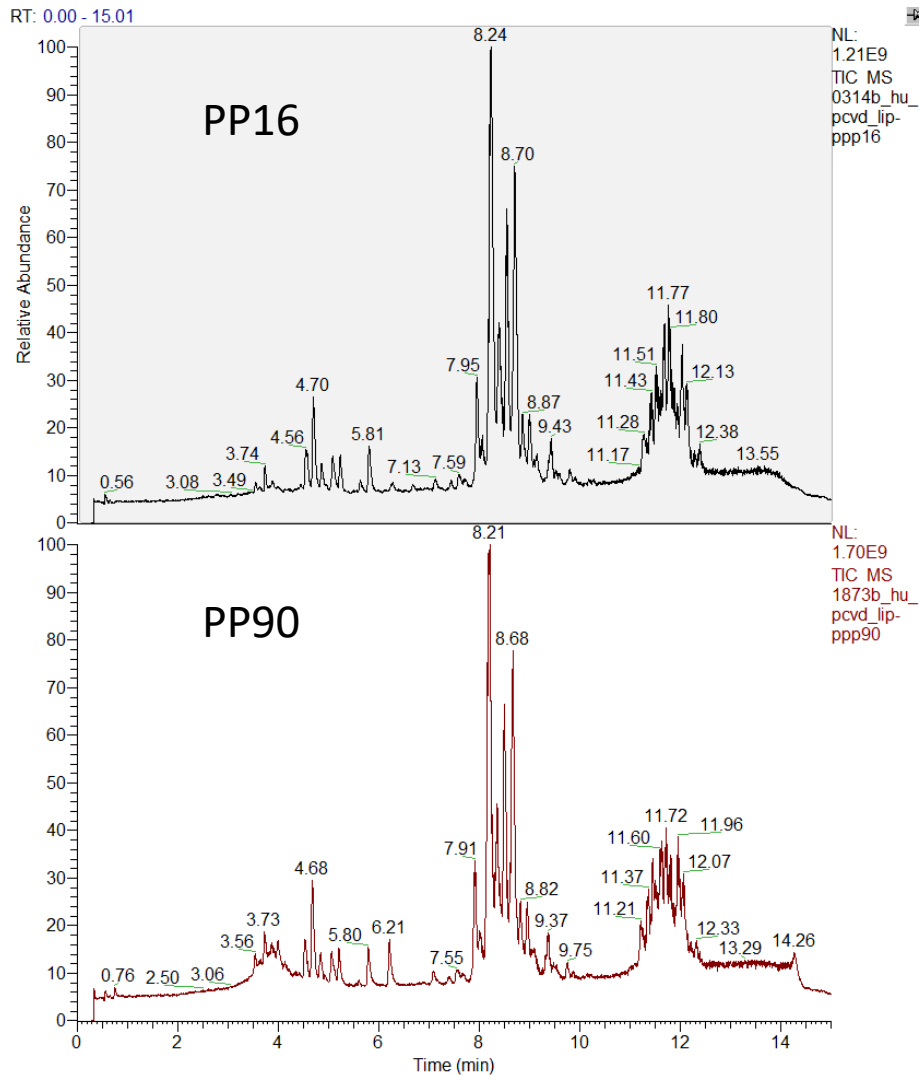

### b. Extracted Ion Chromatograms

Q1797 m/z 281.0506; RT 3.98

Matches missingness pattern of MetProc

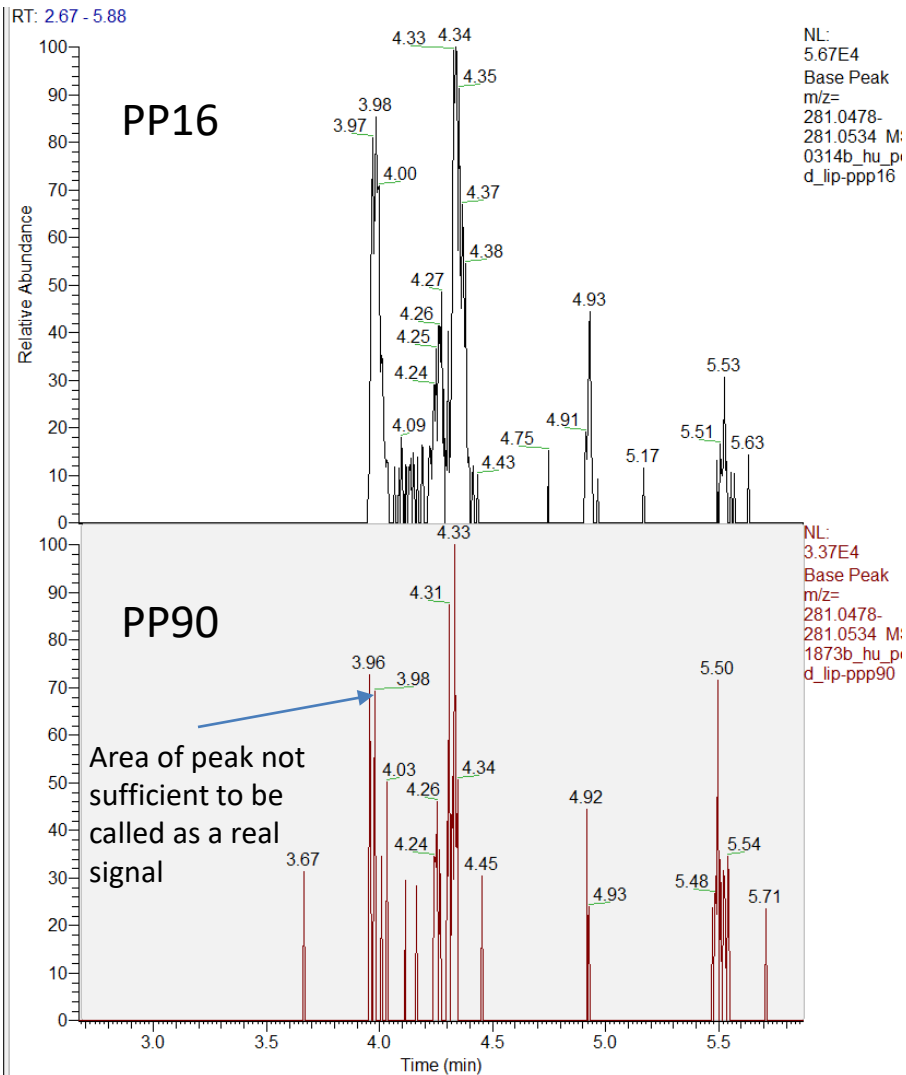

Panel 3

# a. Total Ion Chromatograms

# b. Extracted Ion Chromatograms

QI860 m/z 291.1800; RT 3.94

Matches missingness pattern of MetProc

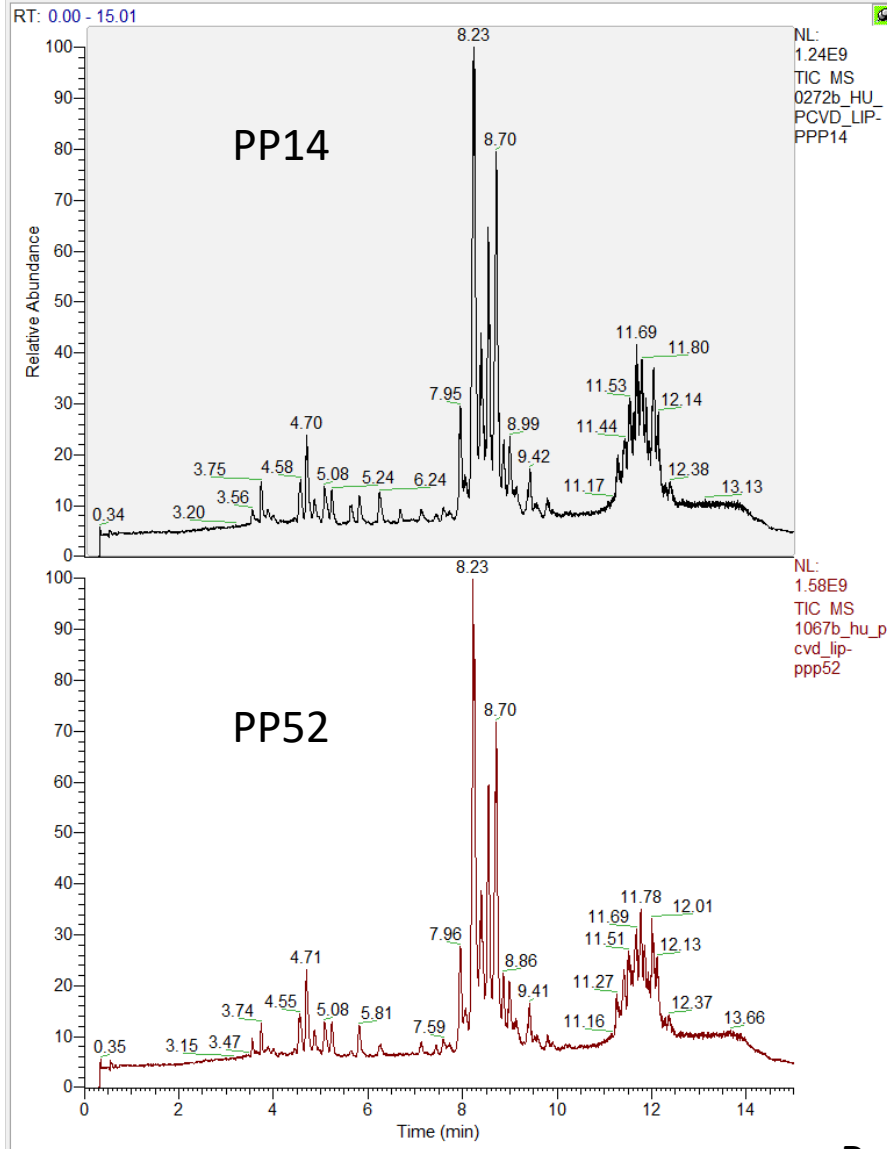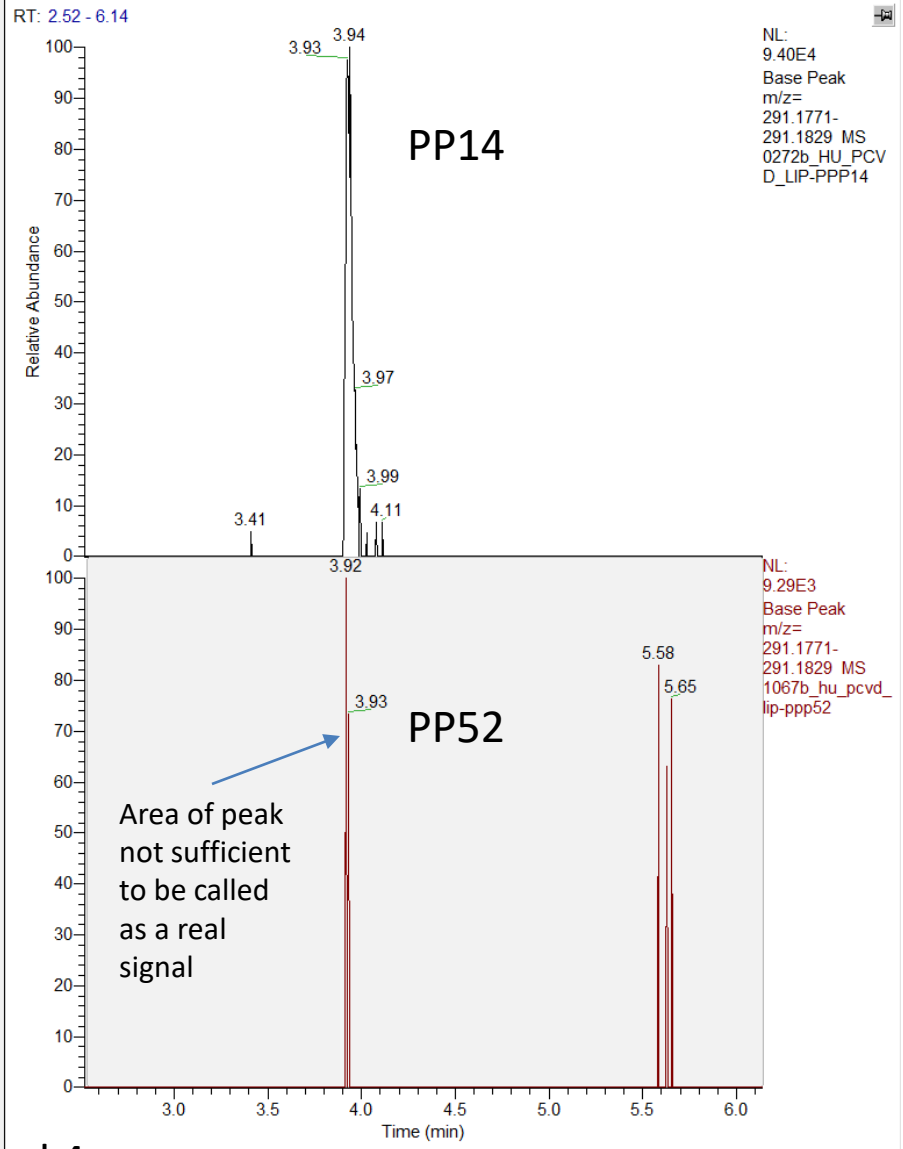

Panel 4

# a. Total Ion Chromatograms

# b. Extracted Ion Chromatograms

QI975 m/z 304.2997; RT Col 1 3.85; Col2 4.03

QI did not align the RT correctly between columns

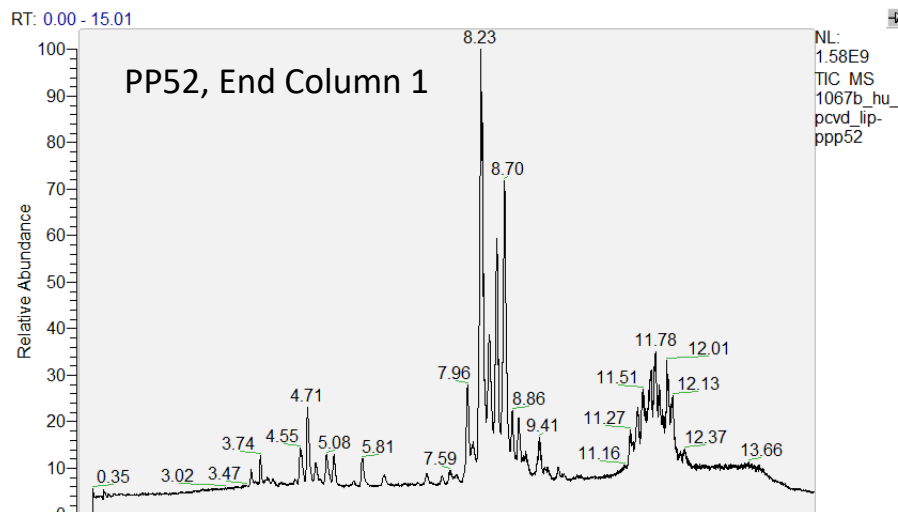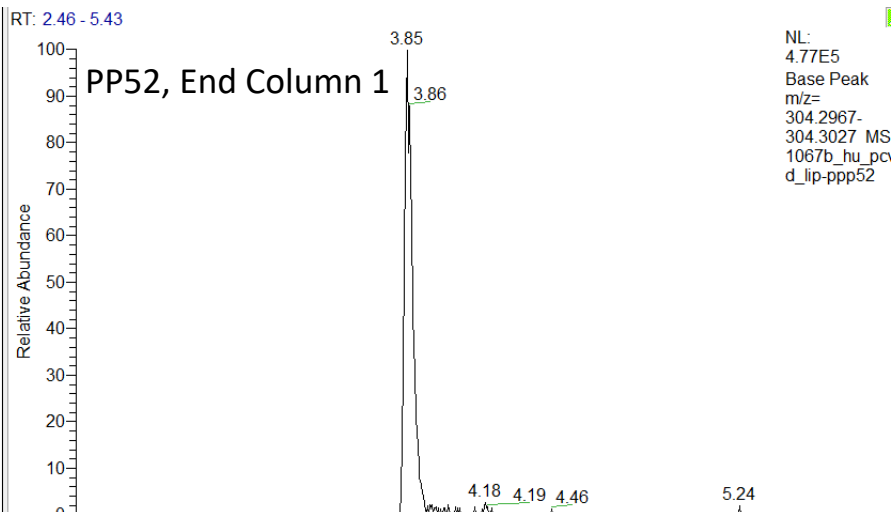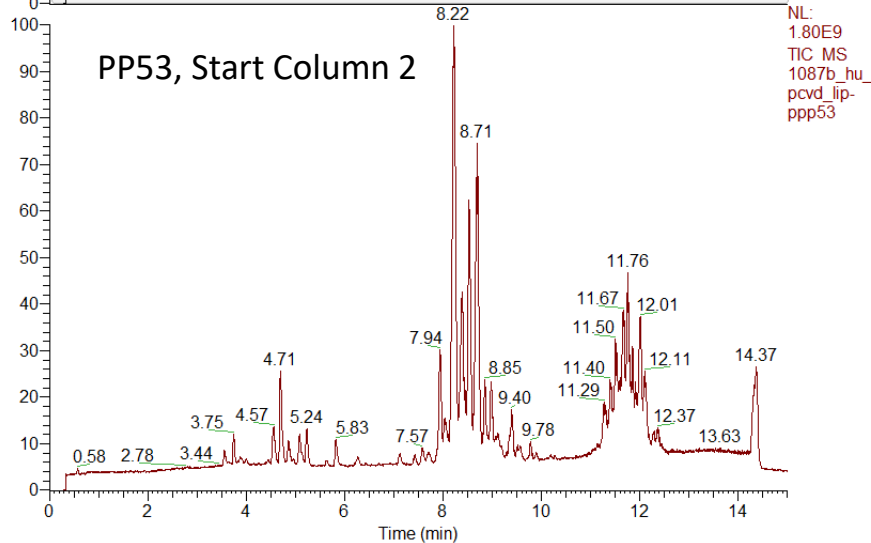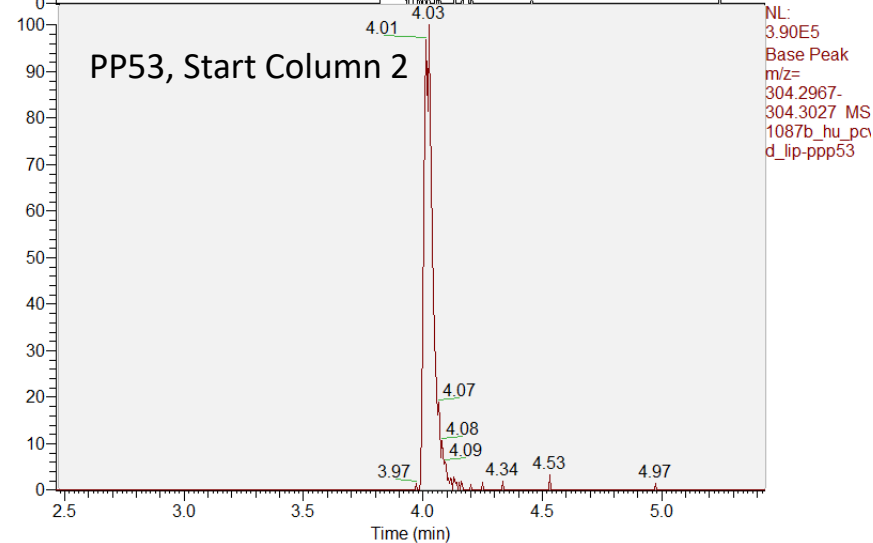

### a. Total Ion Chromatograms

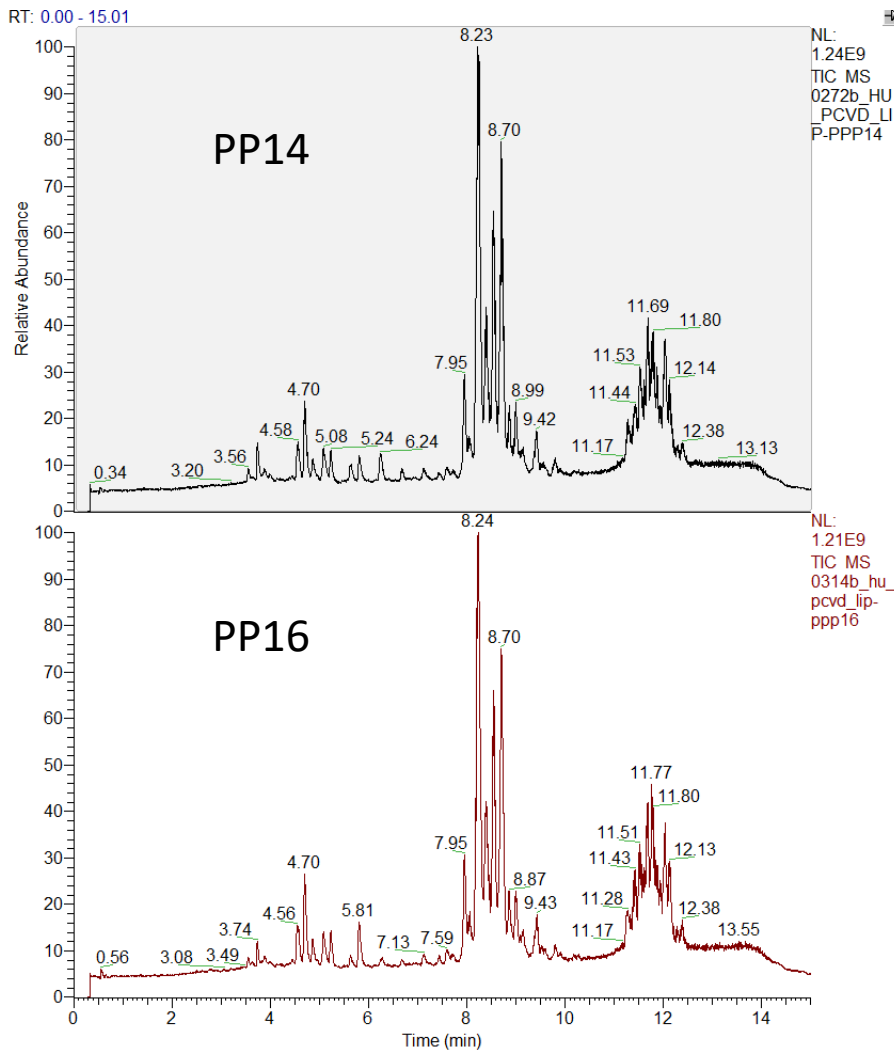

### b. Extracted Ion Chromatograms

QI1002 m/z 311.1641; RT 4.40

Matches missingness pattern of MetProc

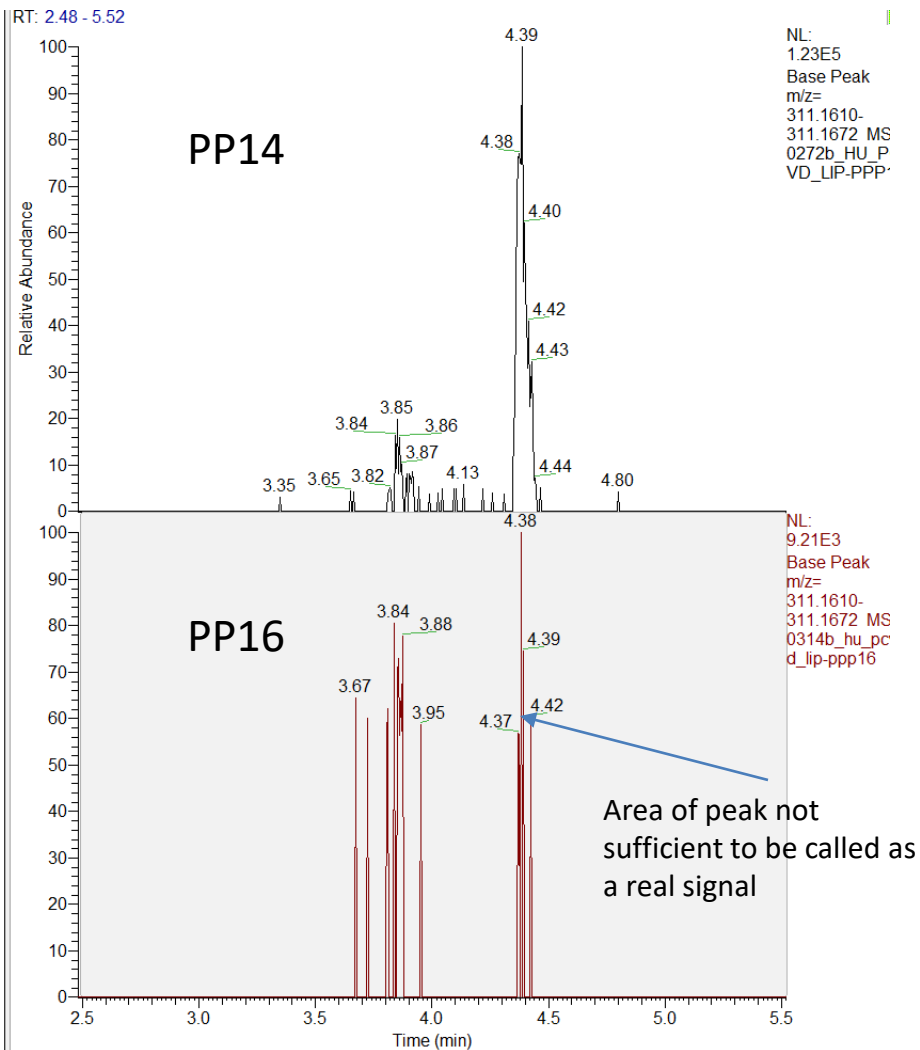



### a. Total Ion Chromatograms

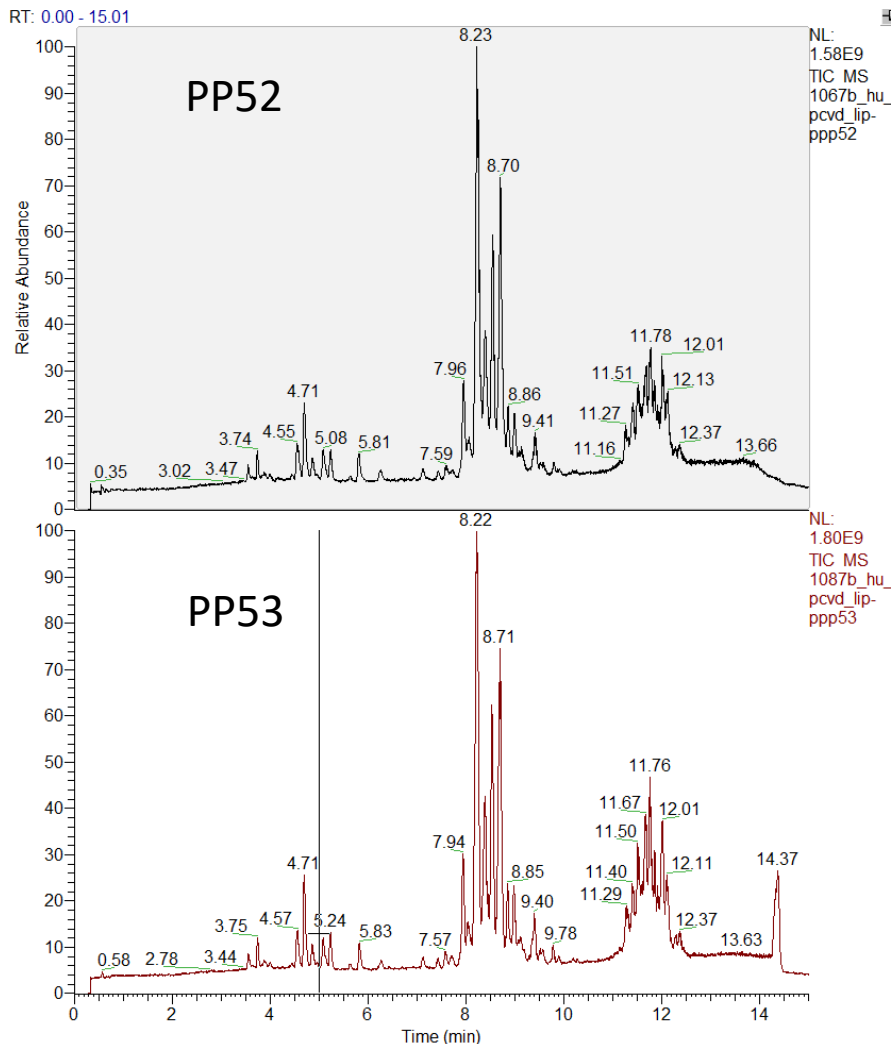

### b. Extracted Ion Chromatograms

QI1869 m/z 429.31841; RT Col1 4.3, Col2 4.06  
 QI did not align the RT correctly between columns

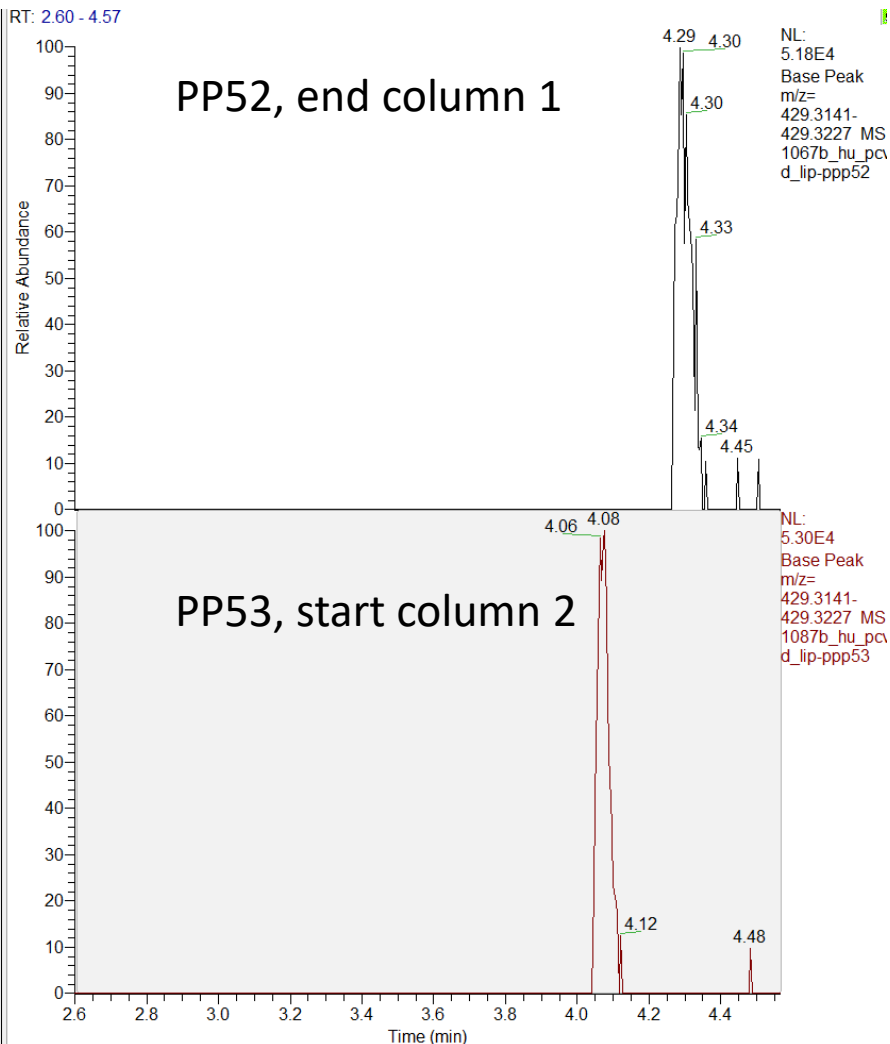

# a. Total Ion Chromatograms

# b. Extracted Ion Chromatograms

QI2116 m/z 456.3320; RT 3.85

QI did not detect the peak in Col 2, while Visual inspection shows there was a peak

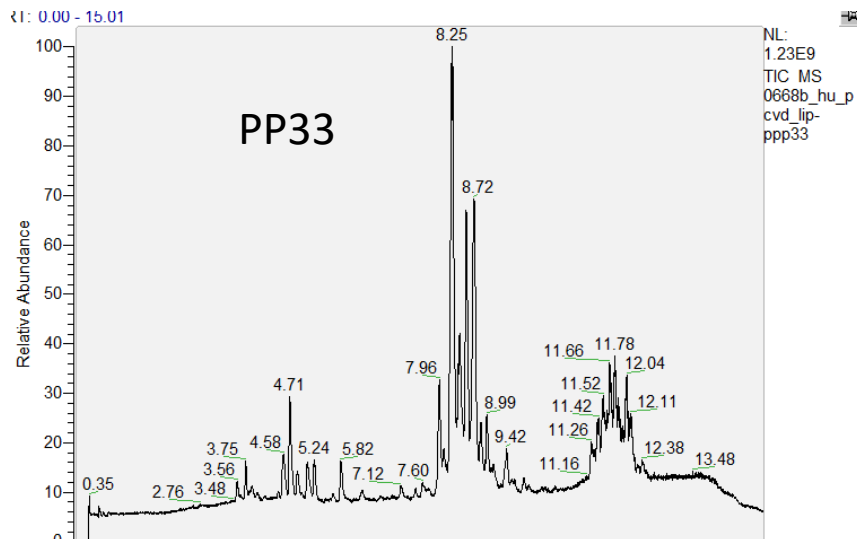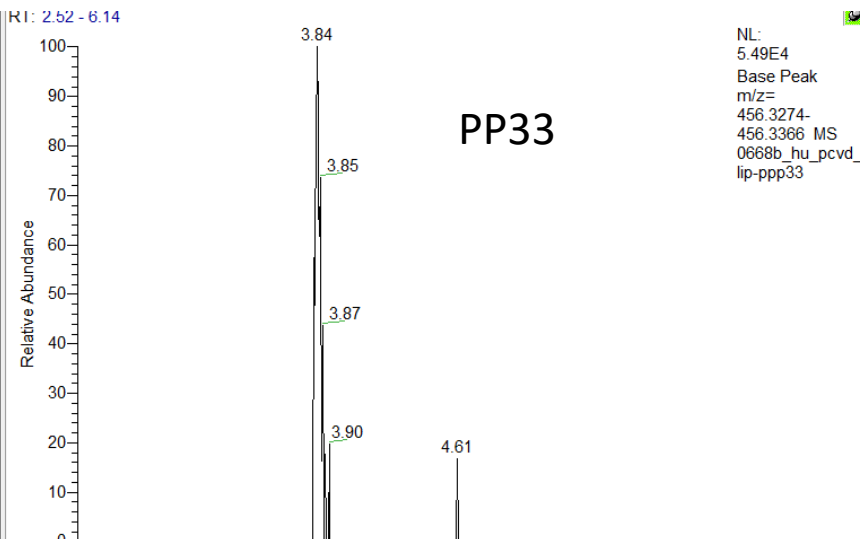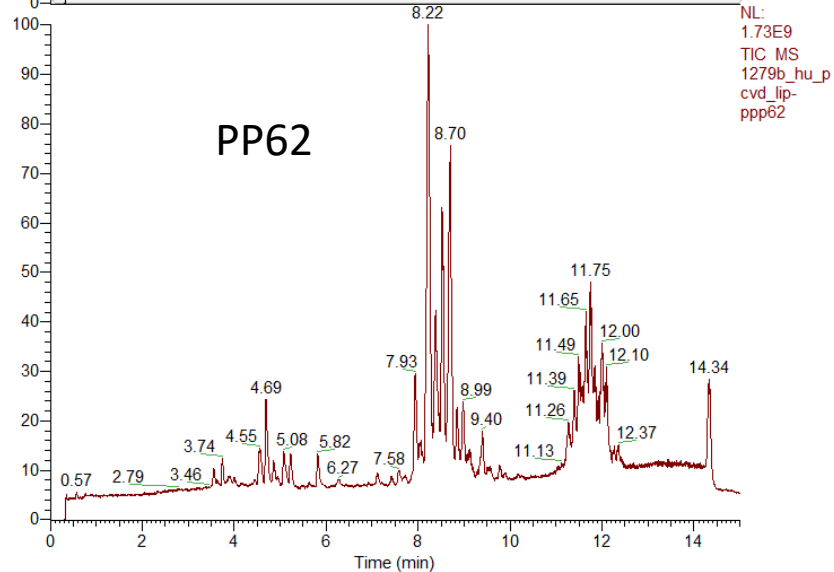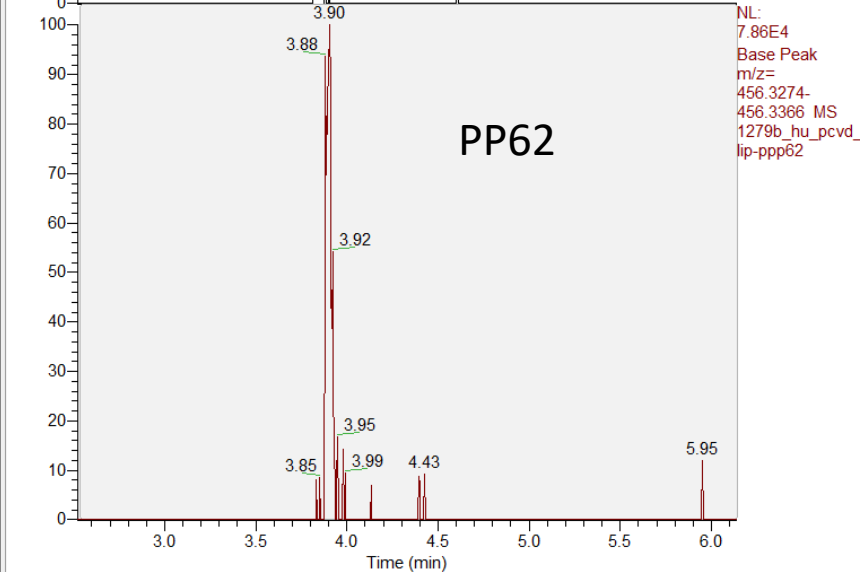

Panel 8

# a. Total Ion Chromatograms

# b. Extracted Ion Chromatograms

QI2331 m/z 482.4931 RT 9.65

Matches missingness pattern of MetProc

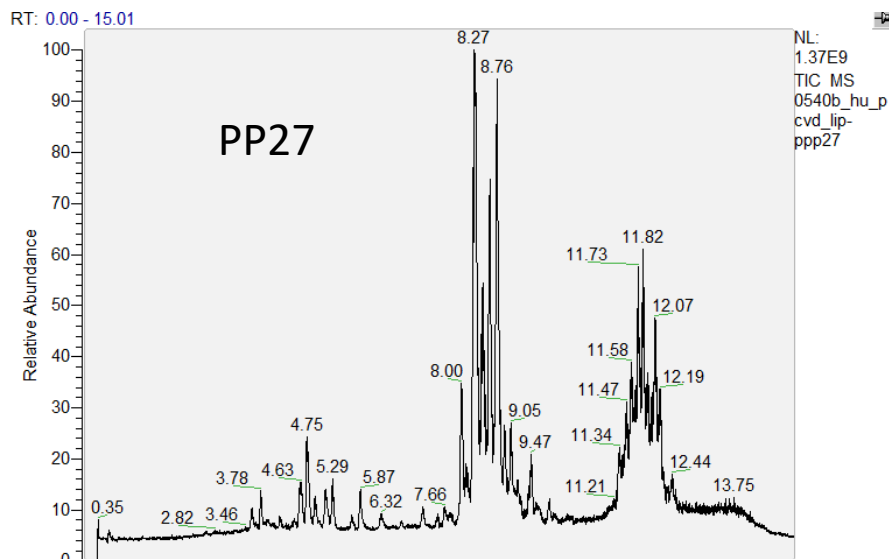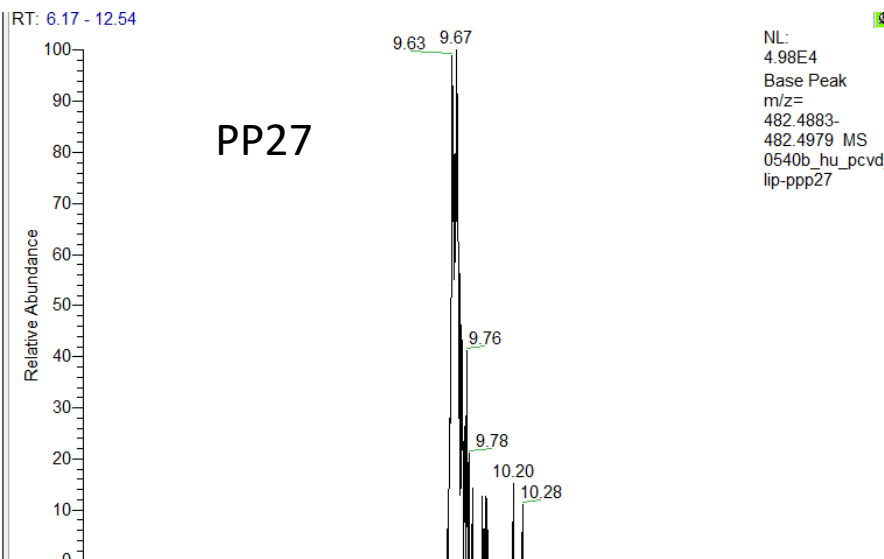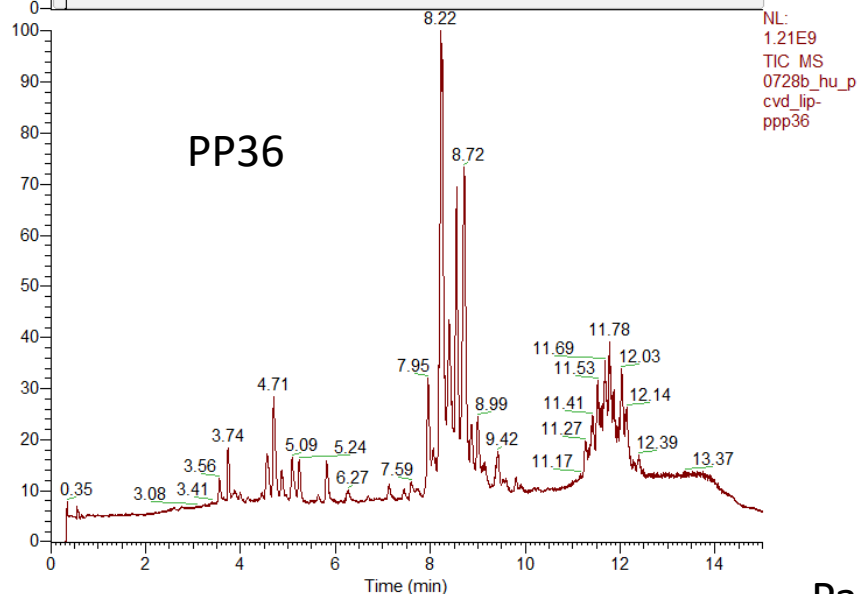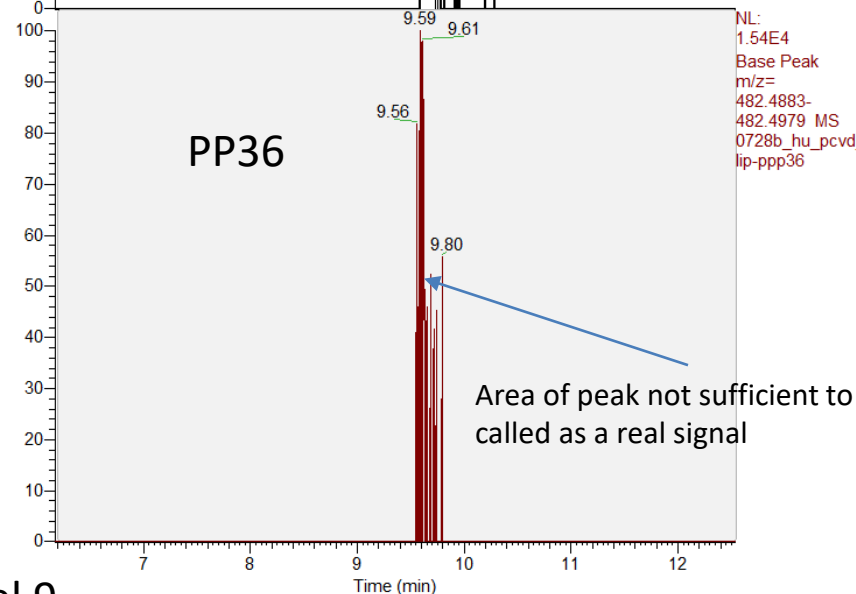

Panel 9

# a. Total Ion Chromatograms

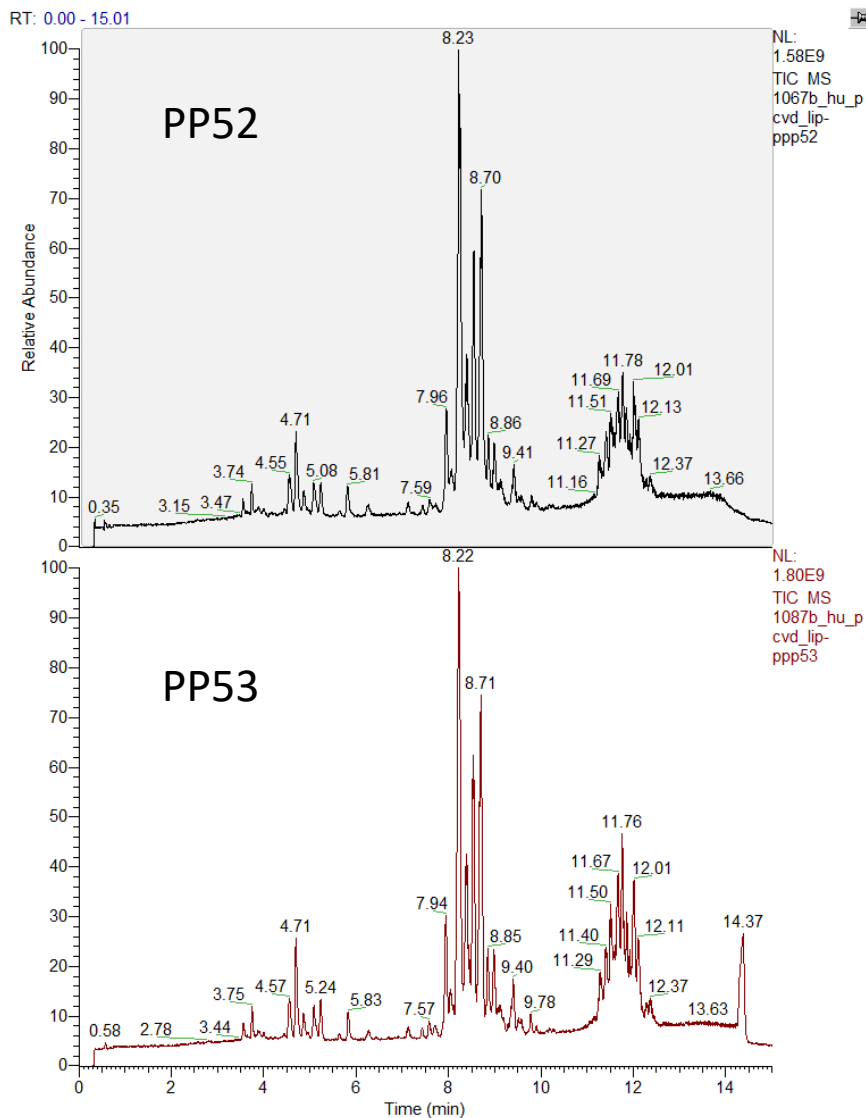

# b. Extracted Ion Chromatograms

QI2502 m/z 512.4676 RT Col1: 6.45, Col2: 7.05  
QI did not align the RT correctly between columns

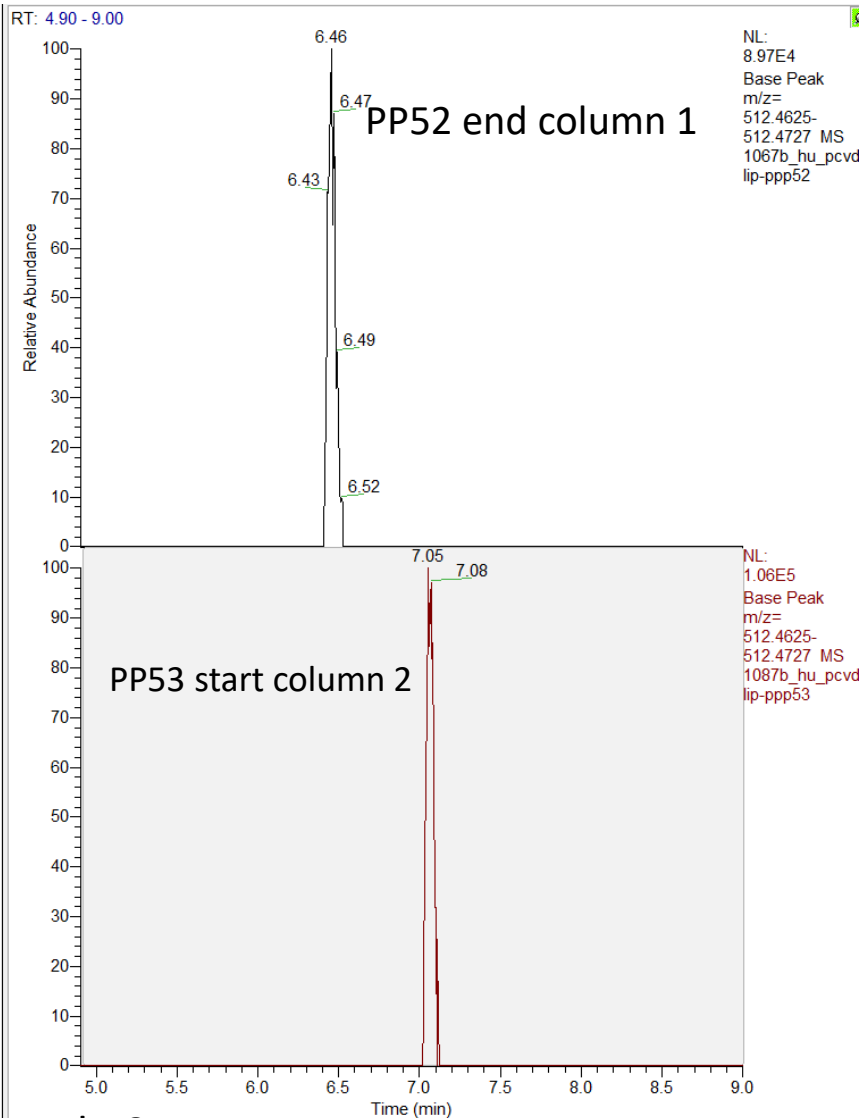

# a. Total Ion Chromatograms

# b. Extracted Ion Chromatograms

Q12543 m/z 520.8613 RT 13.74

Peaks detected in Q1 proved to be background noise

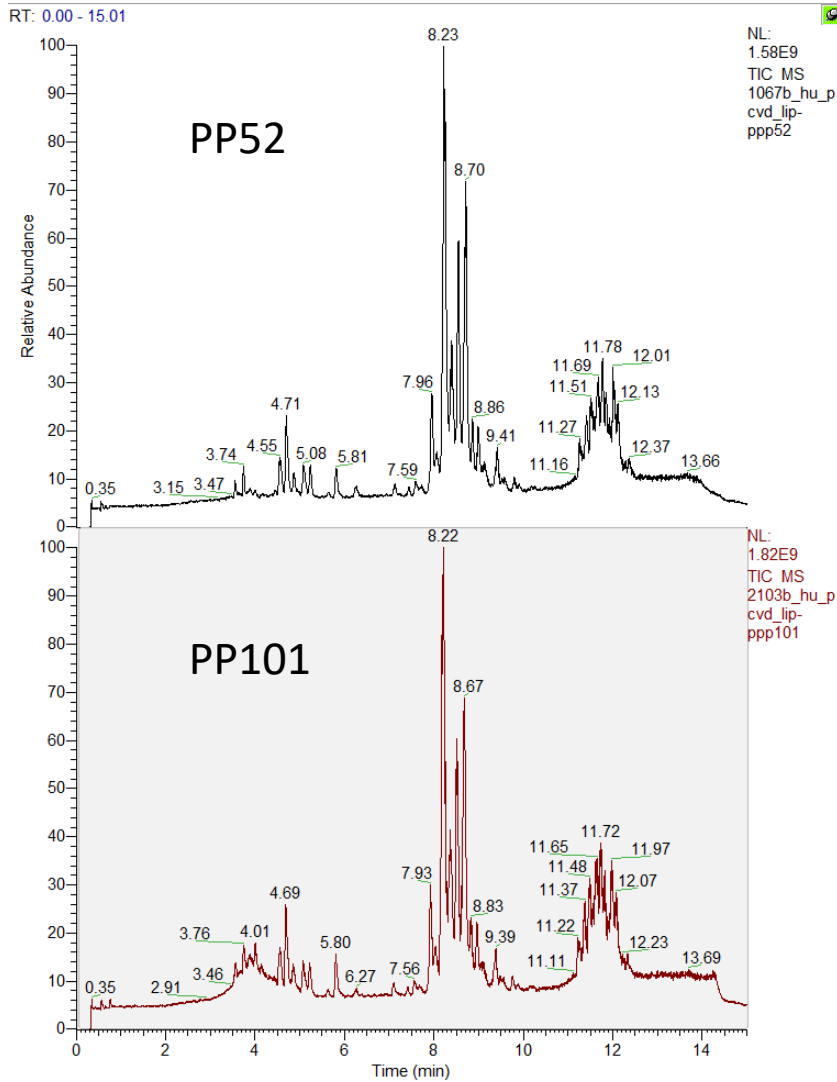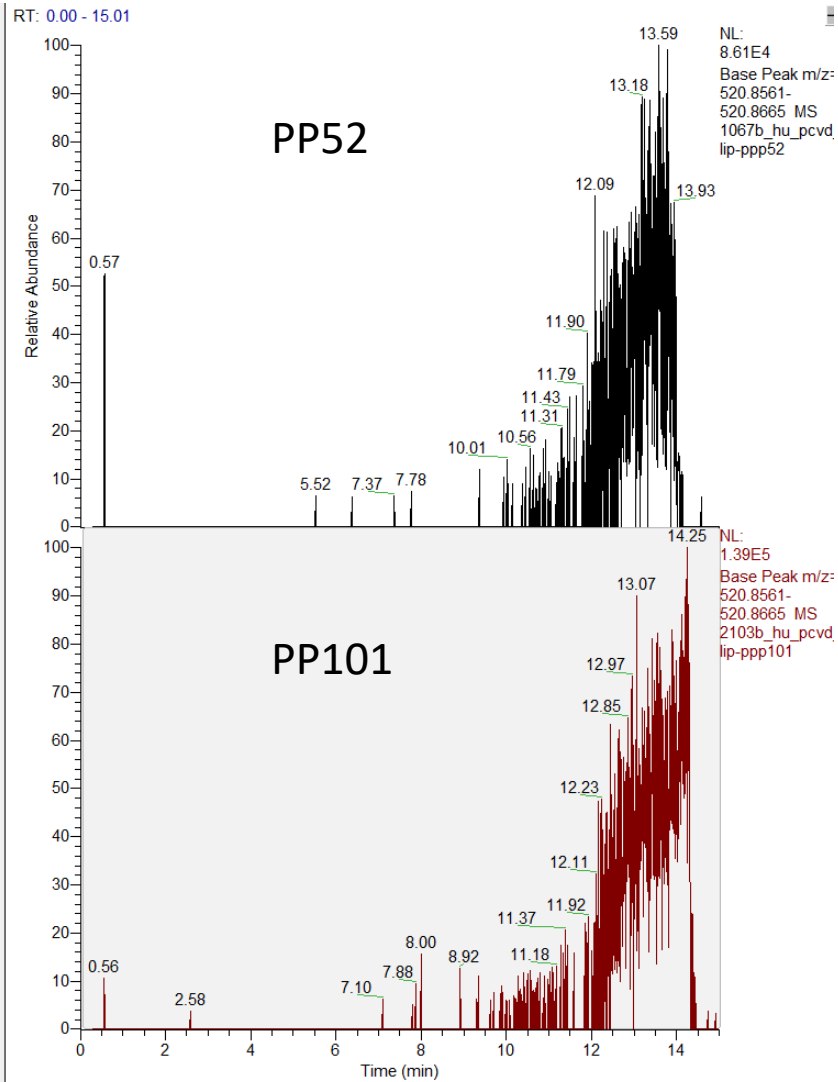

Panel 11

# a. Total Ion Chromatograms

# b. Extracted Ion Chromatograms

Q12552 m/z 522.5246; RT 10.0

Matches missingness pattern of MetProc

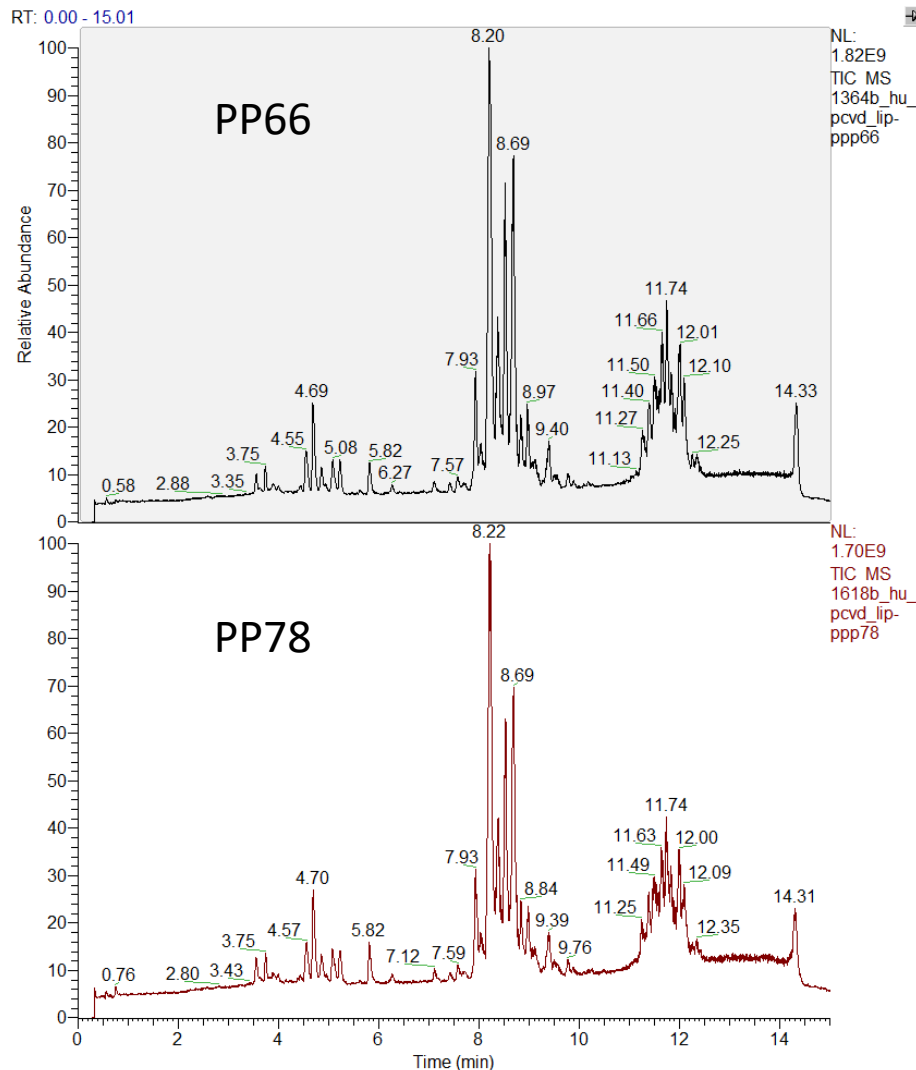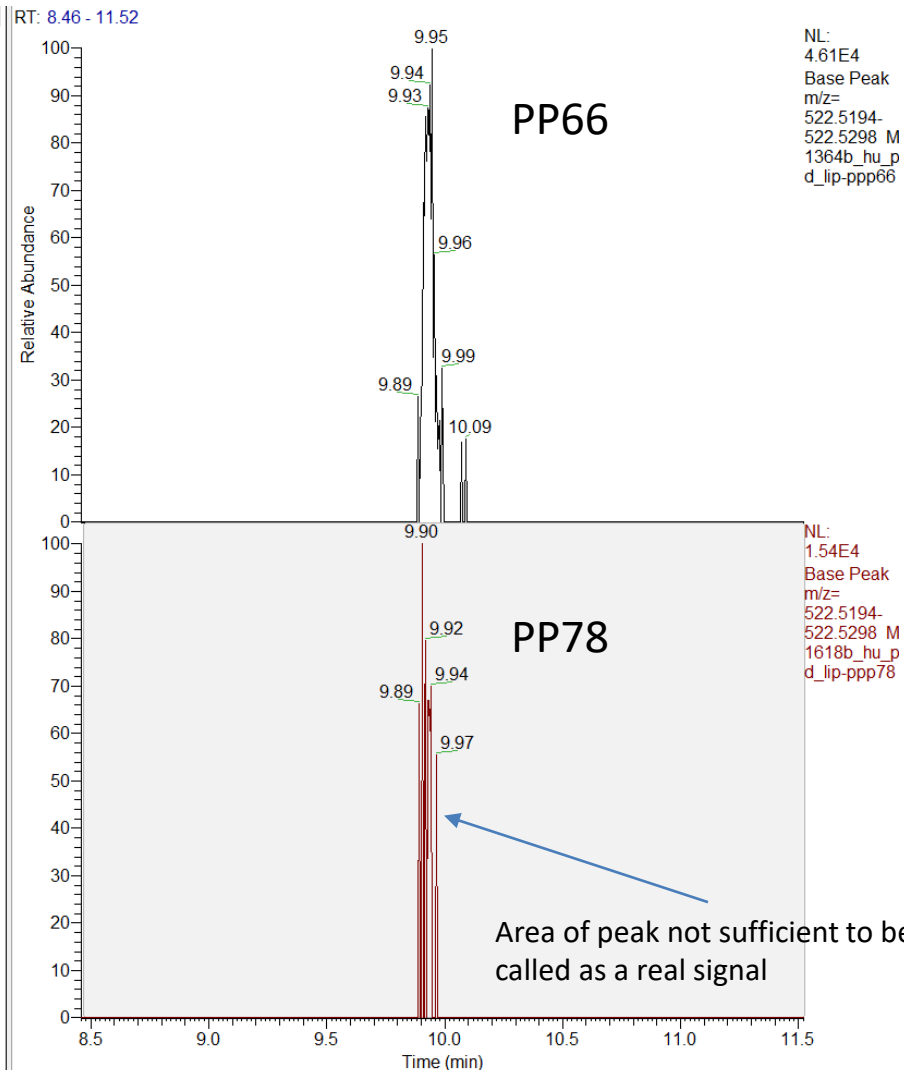

# a. Total Ion Chromatograms

# b. Extracted Ion Chromatograms

QI2620 m/z 533.5295; RT 10.43

Matches missingness pattern of MetProc

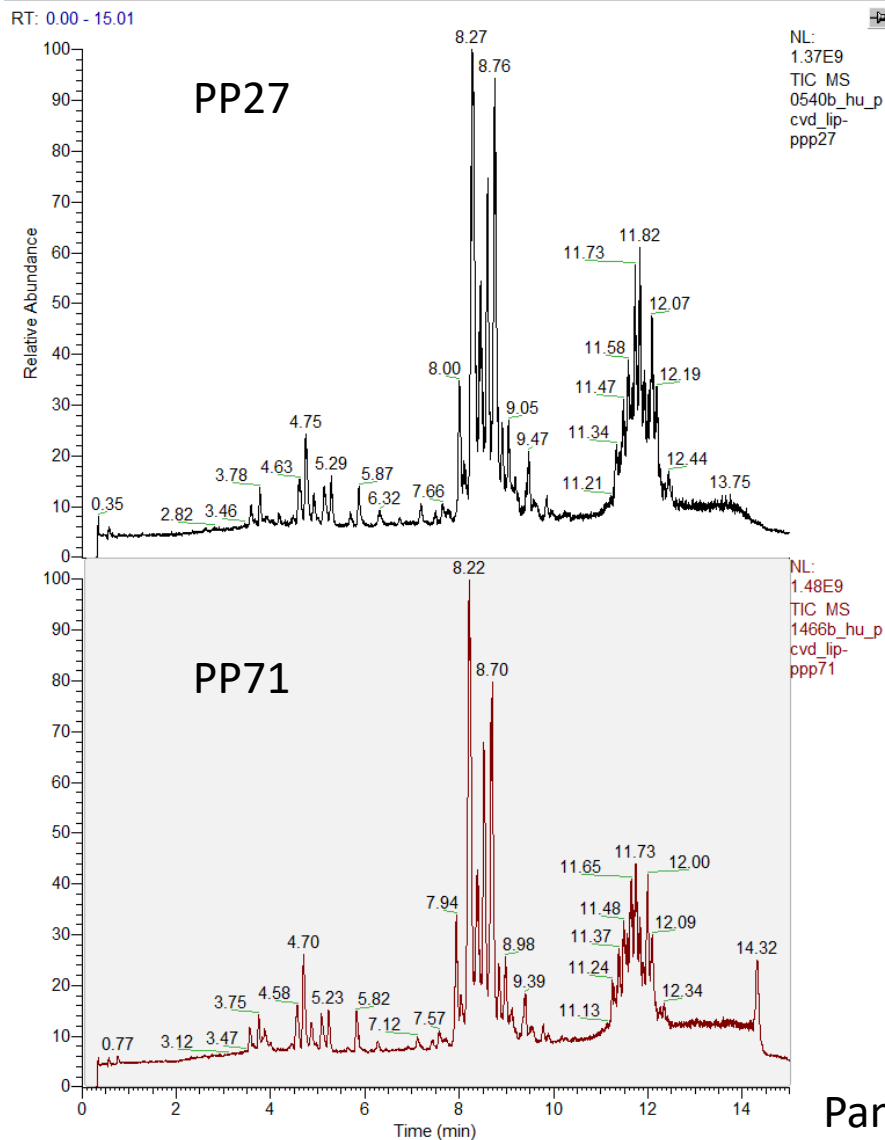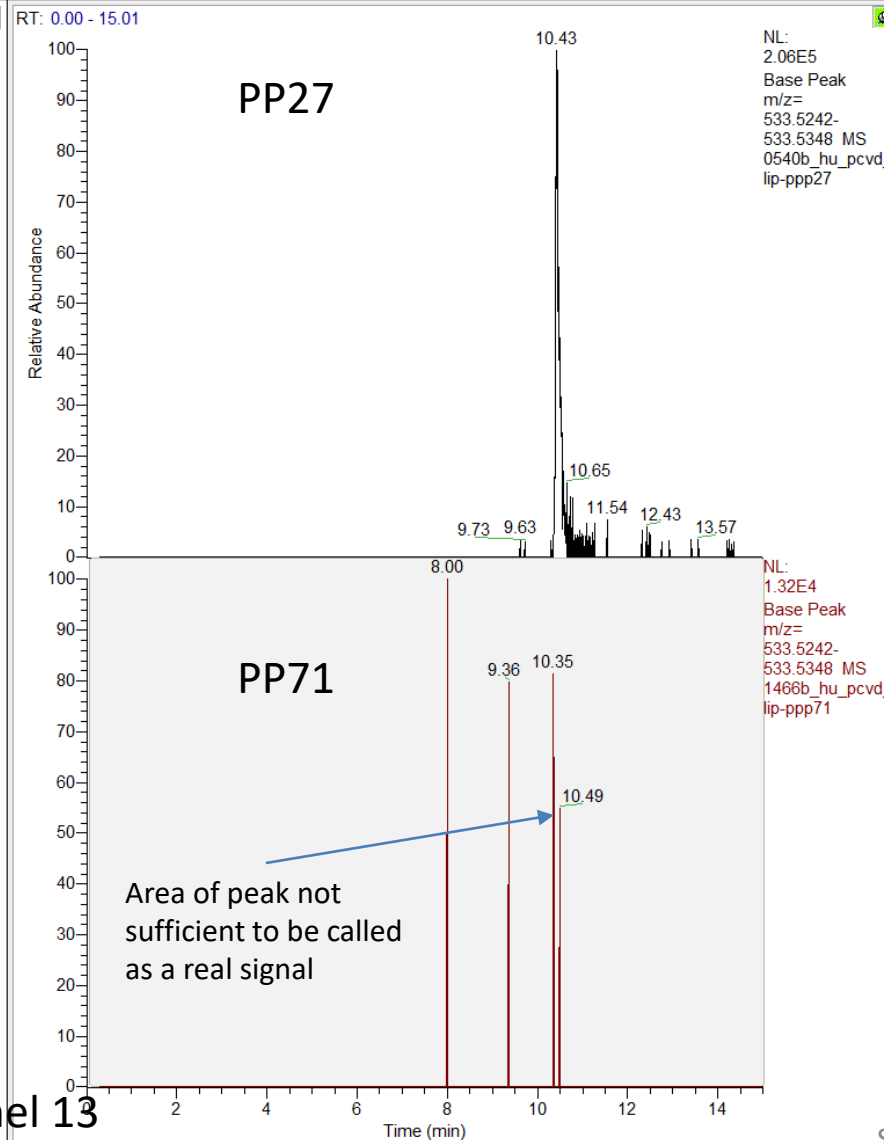

Panel 13

# a. Total Ion Chromatograms

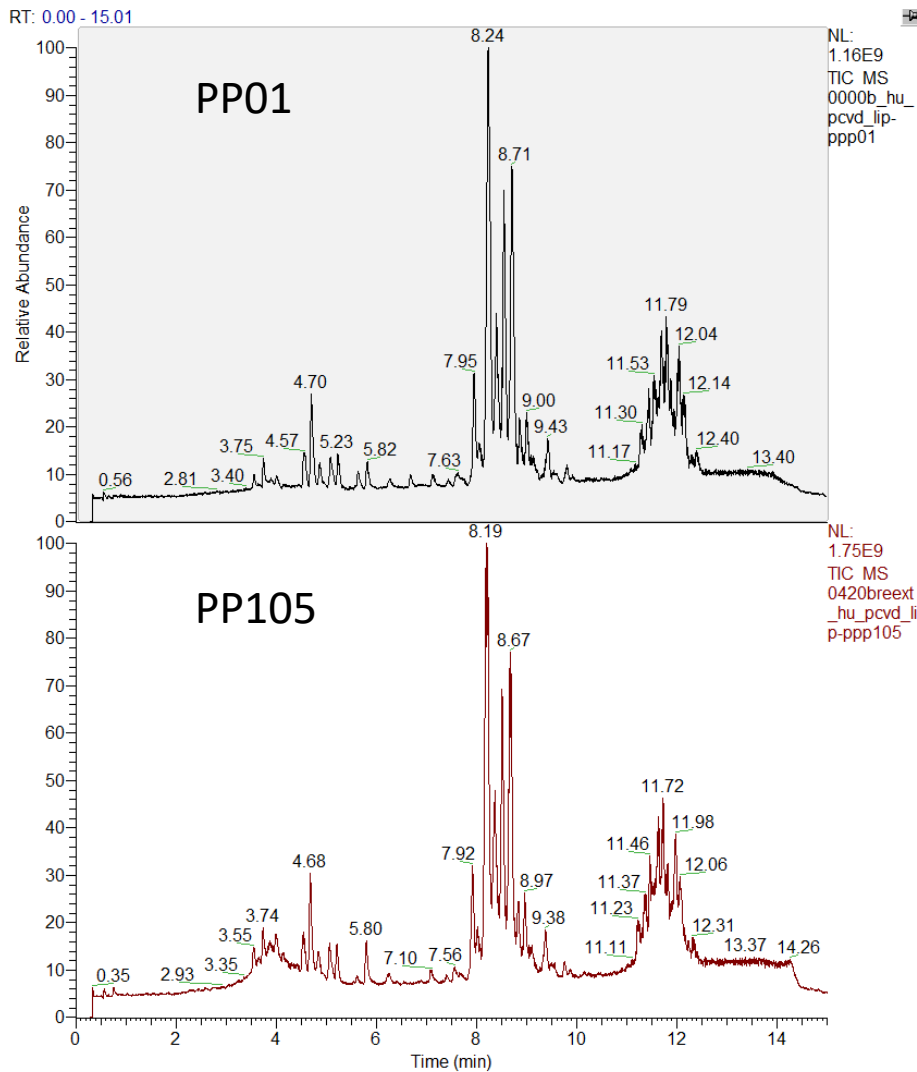

# b. Extracted Ion Chromatograms

QI2675 m/z 537.3945; RT 12.9

Background noise across both columns

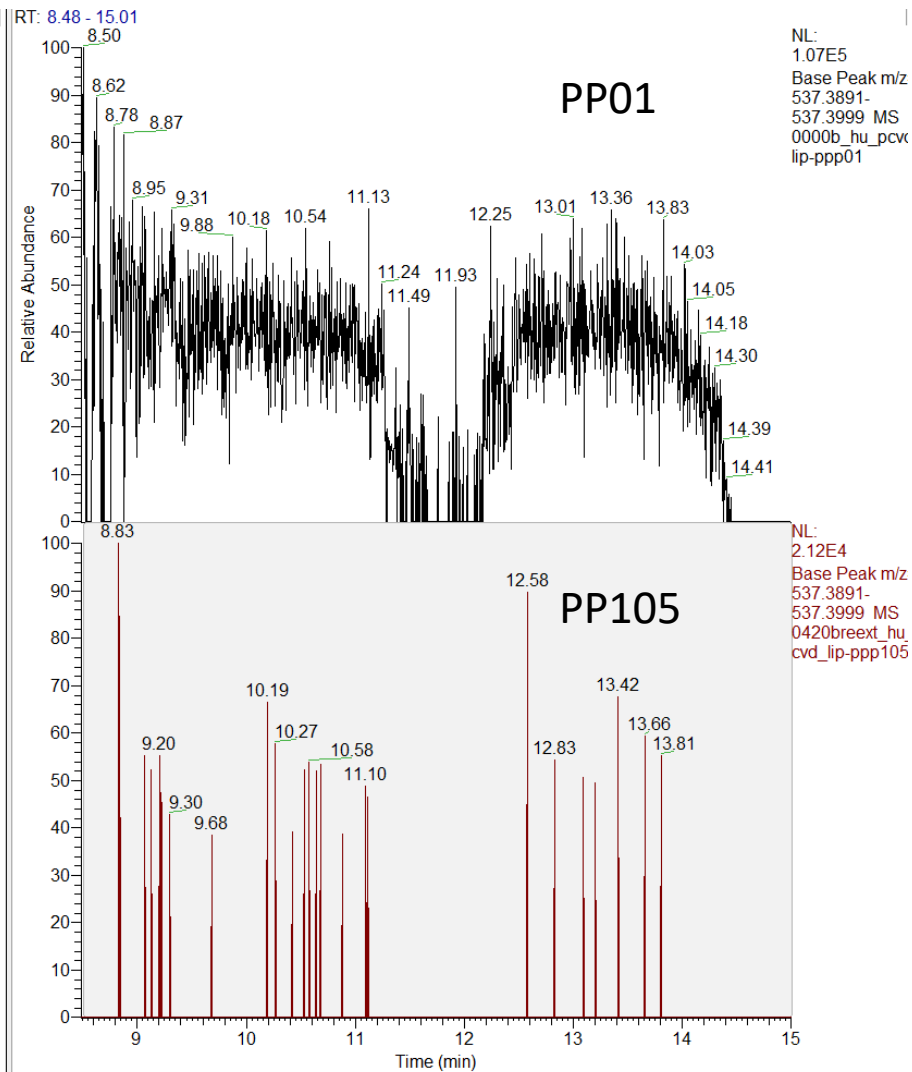



### a. Total Ion Chromatograms

### b. Extracted Ion Chromatograms

Q13239 m/z 622.2767; RT 4.03

Only present in pool 38

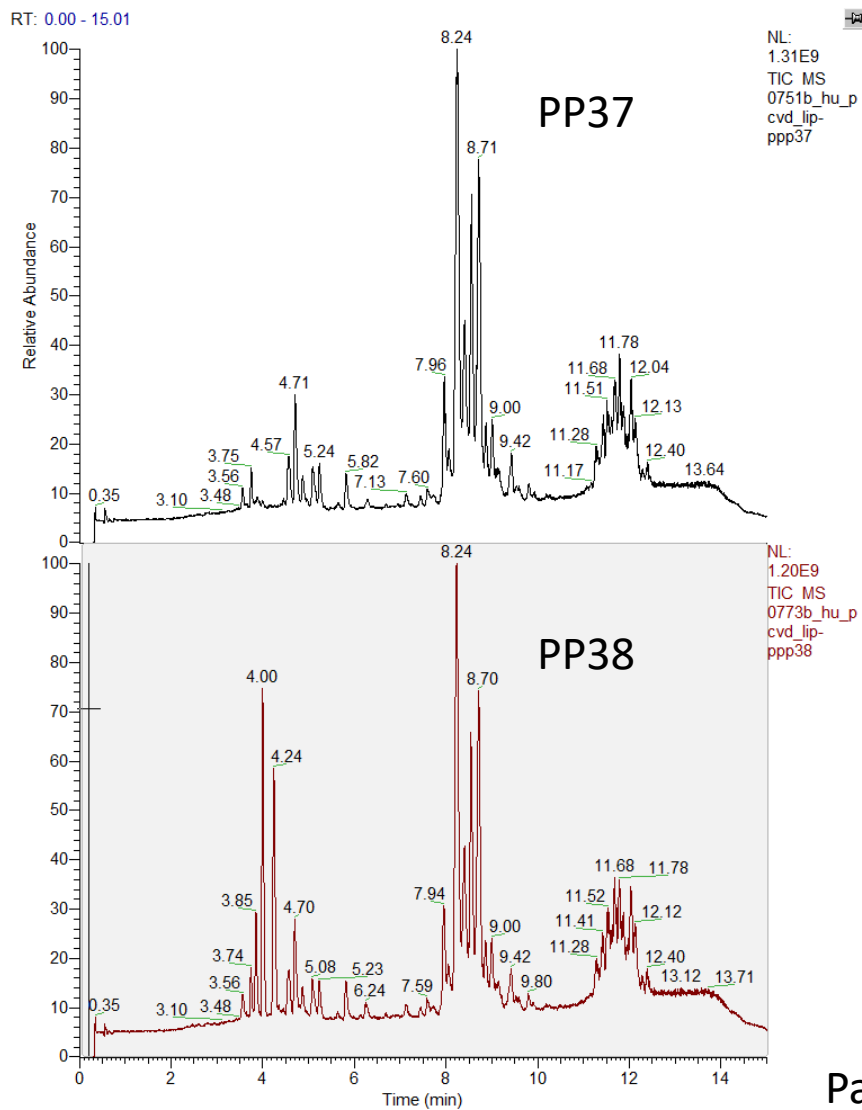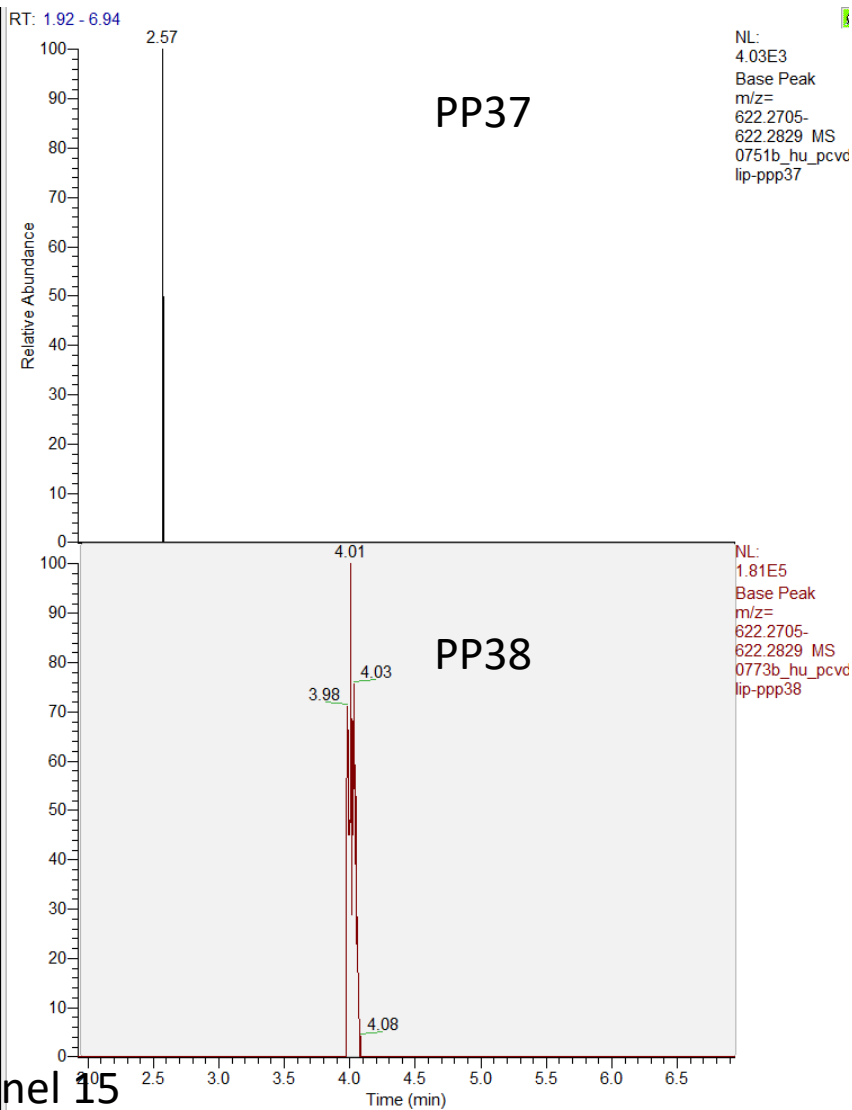

Panel 15

### a. Total Ion Chromatograms

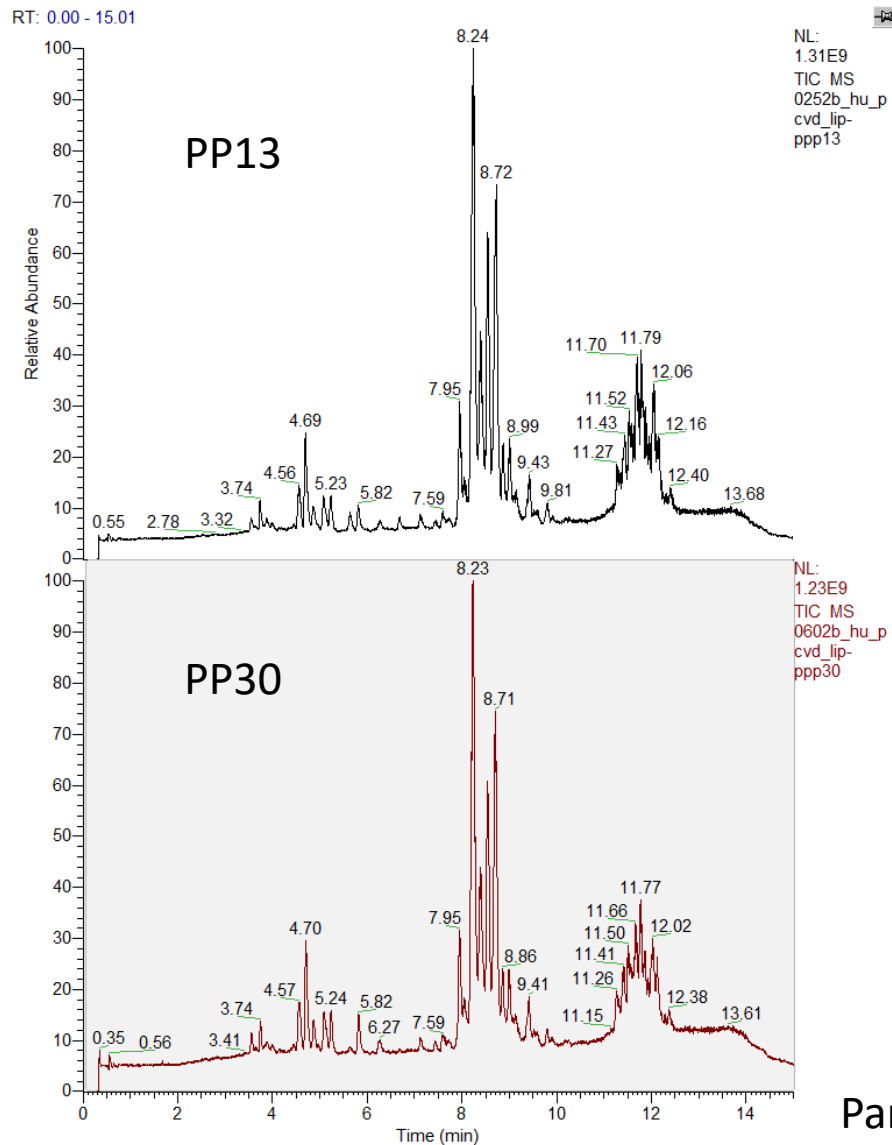

### b. Extracted Ion Chromatograms

Q13339m/z 637.5886; RT 11.4

Matches missingness pattern of MetProc

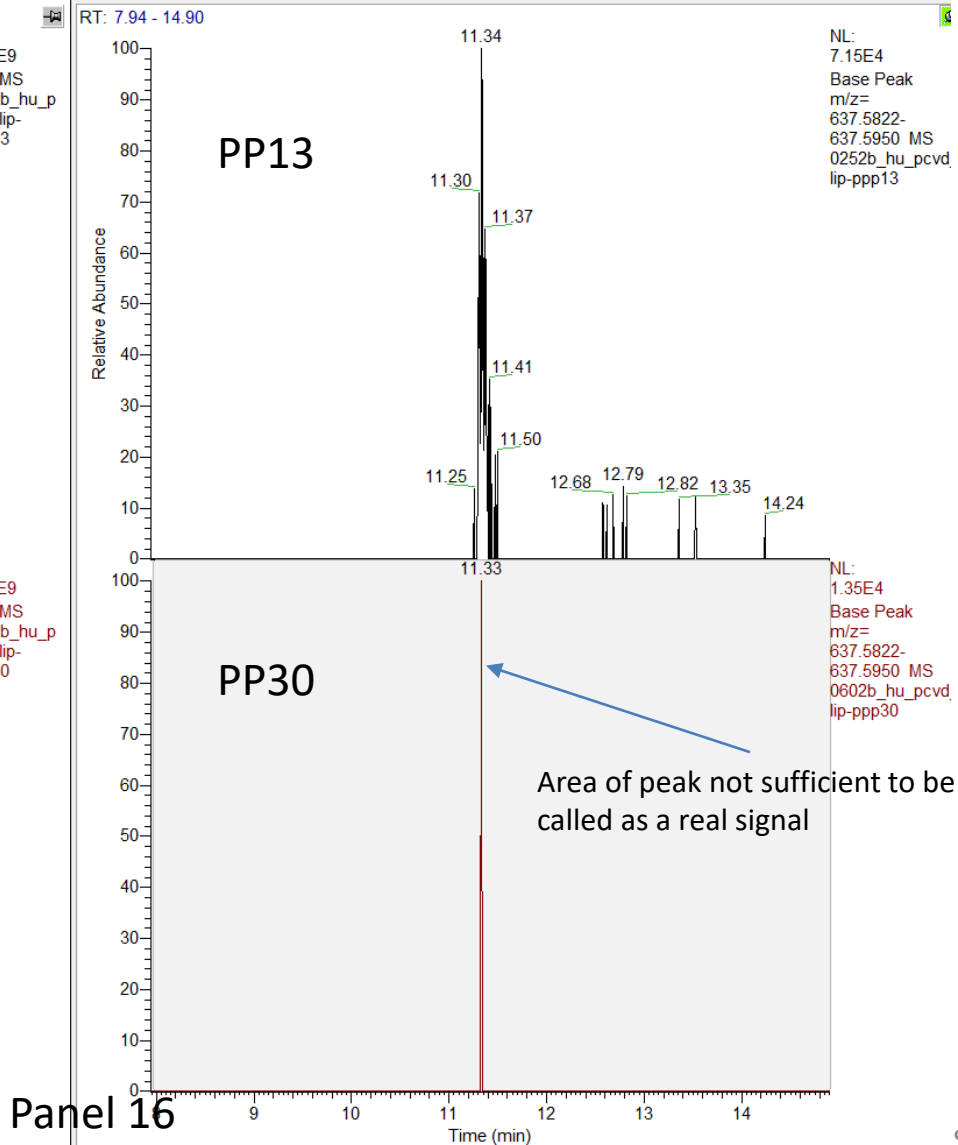

### a. Total Ion Chromatograms

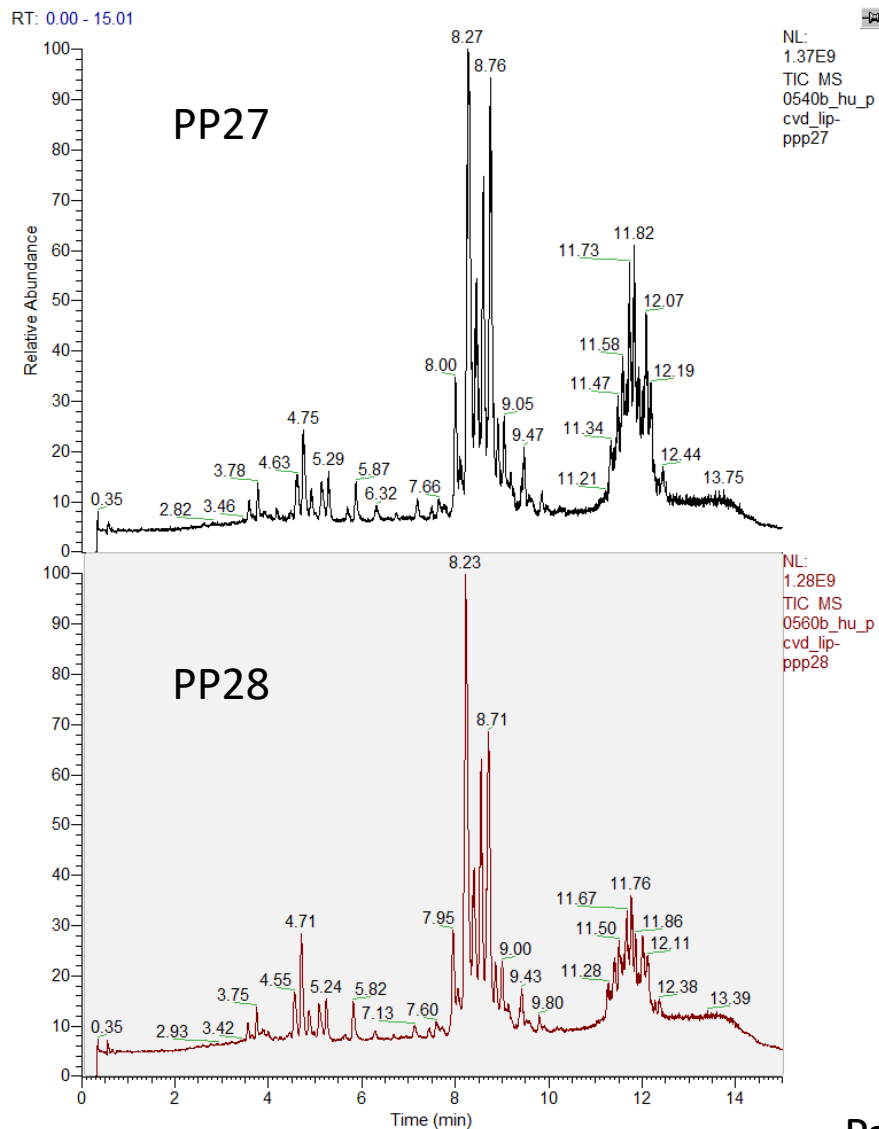

### b. Extracted Ion Chromatograms

Q13579 m/z 673.2641; RT 4.58

Matches missingness pattern of MetProc

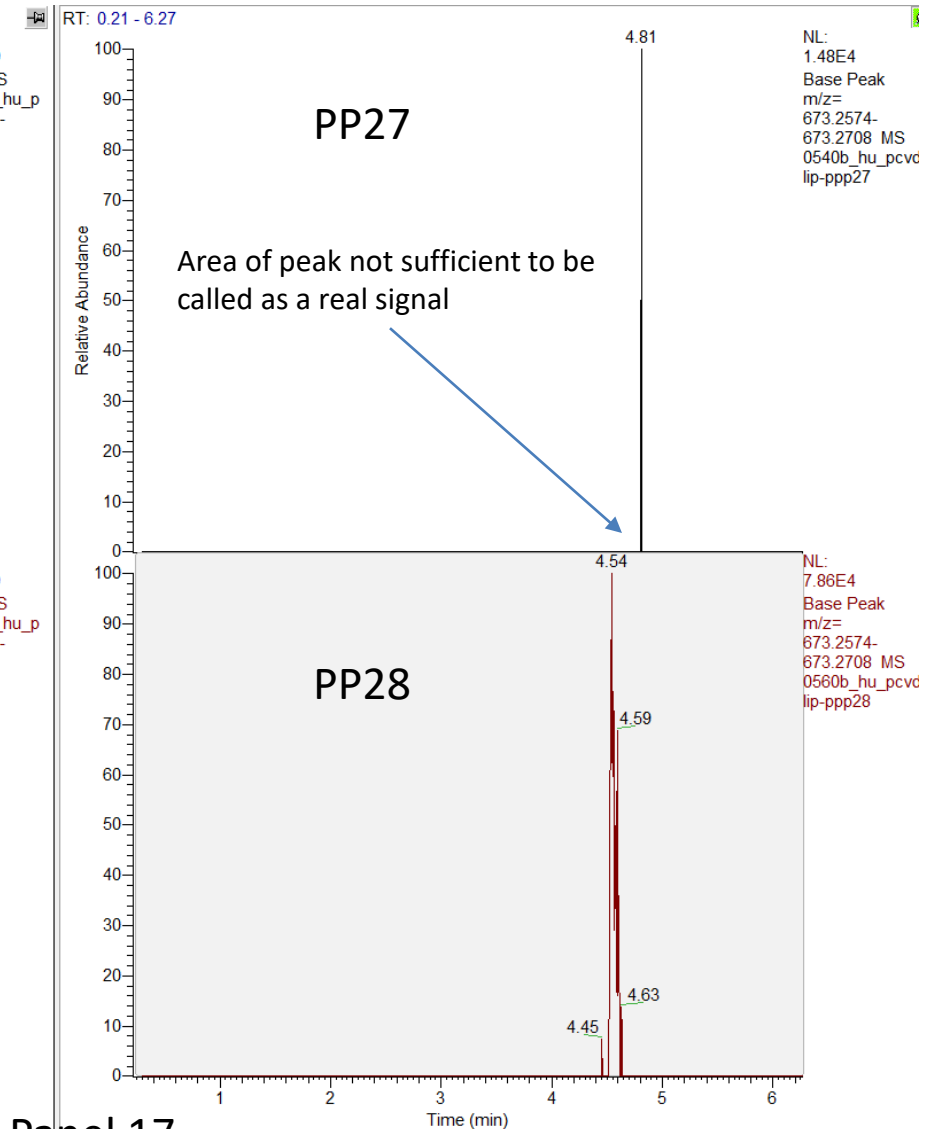

Panel 17

### a. Total Ion Chromatograms

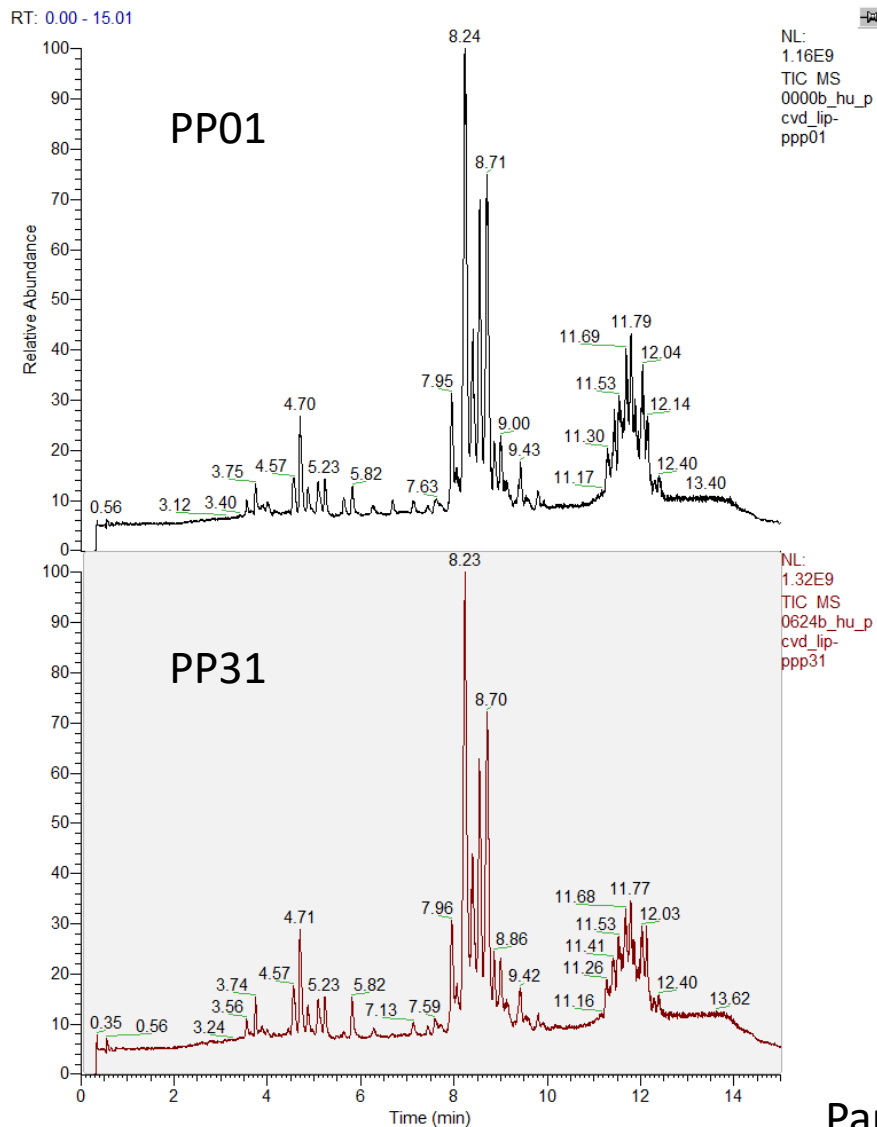

### b. Extracted Ion Chromatograms

QI3827 m/z 711.8228; RT 13.03

Peaks detected in QI proved to be background noise

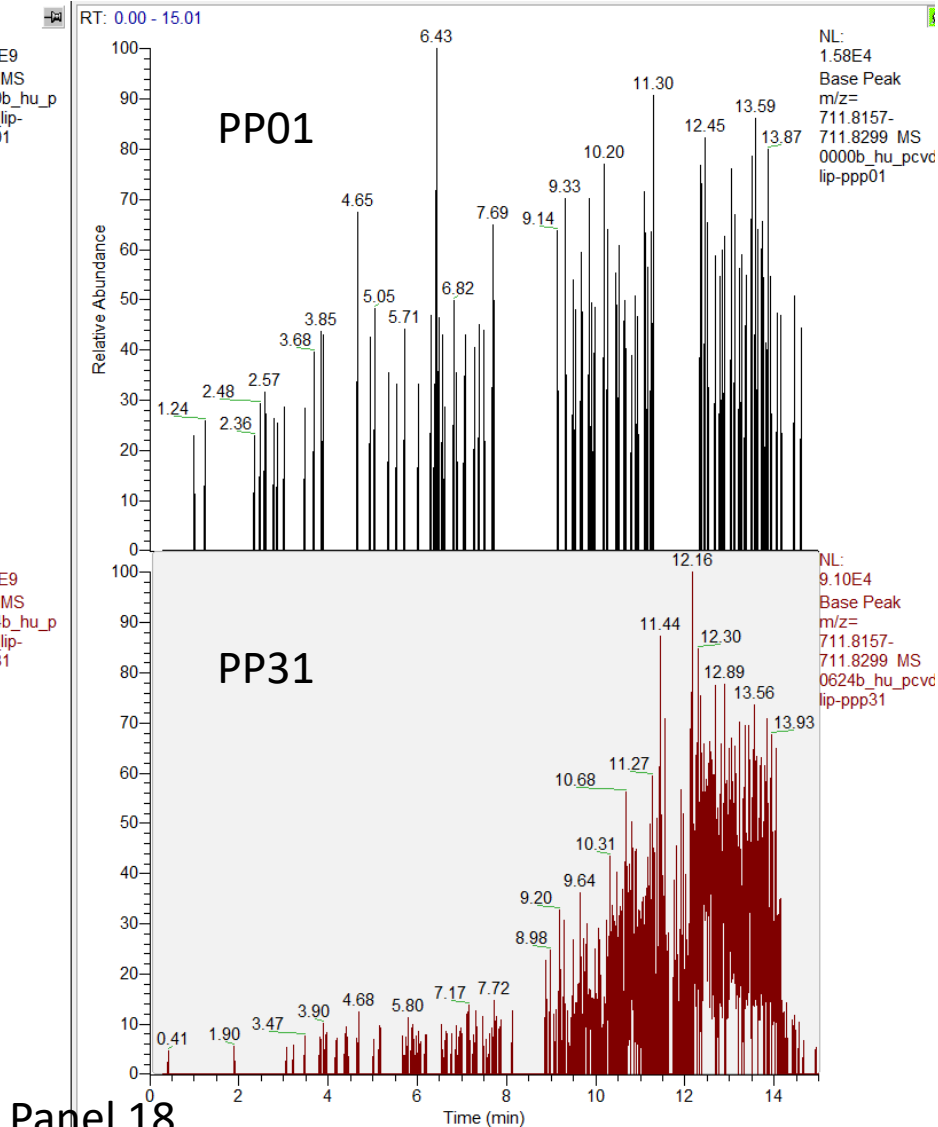

### a. Total Ion Chromatograms

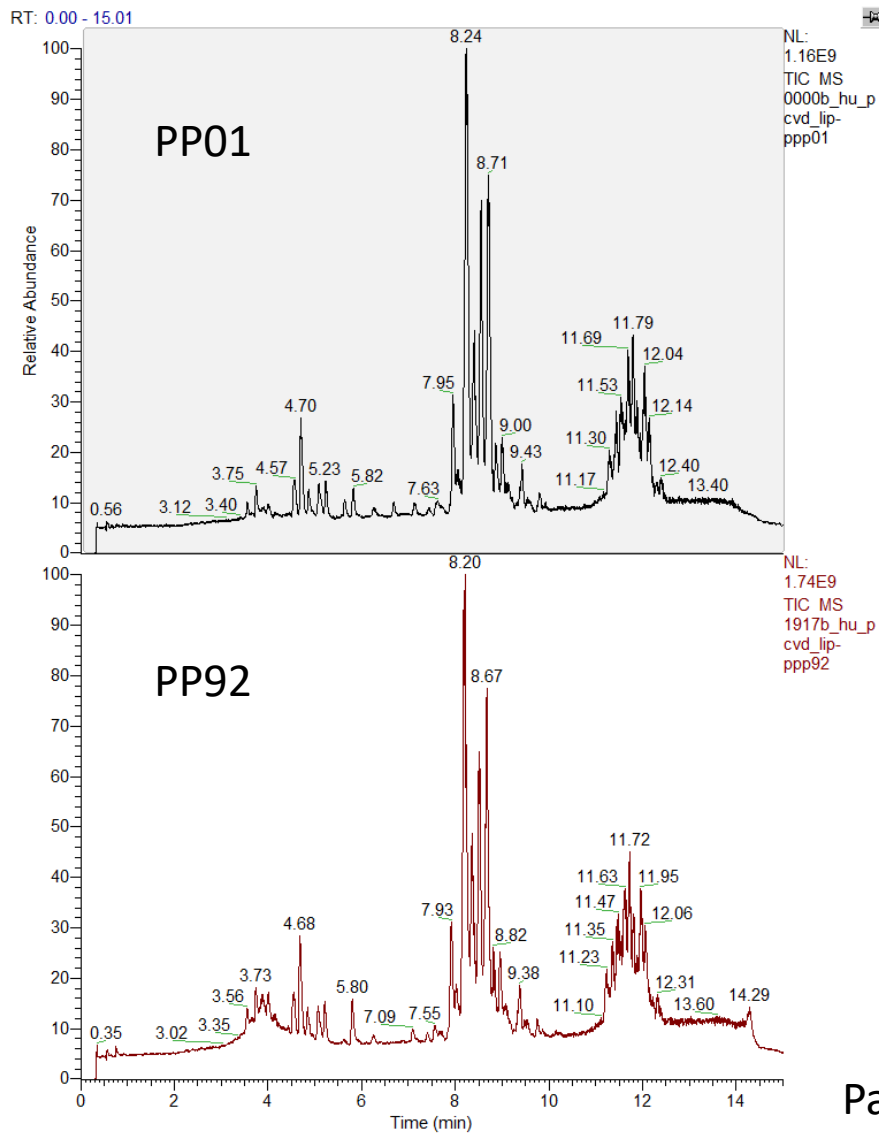

### b. Extracted Ion Chromatograms

QI4513 m/z 799.6203; RT 10.9

Missingness pattern matches MetProc

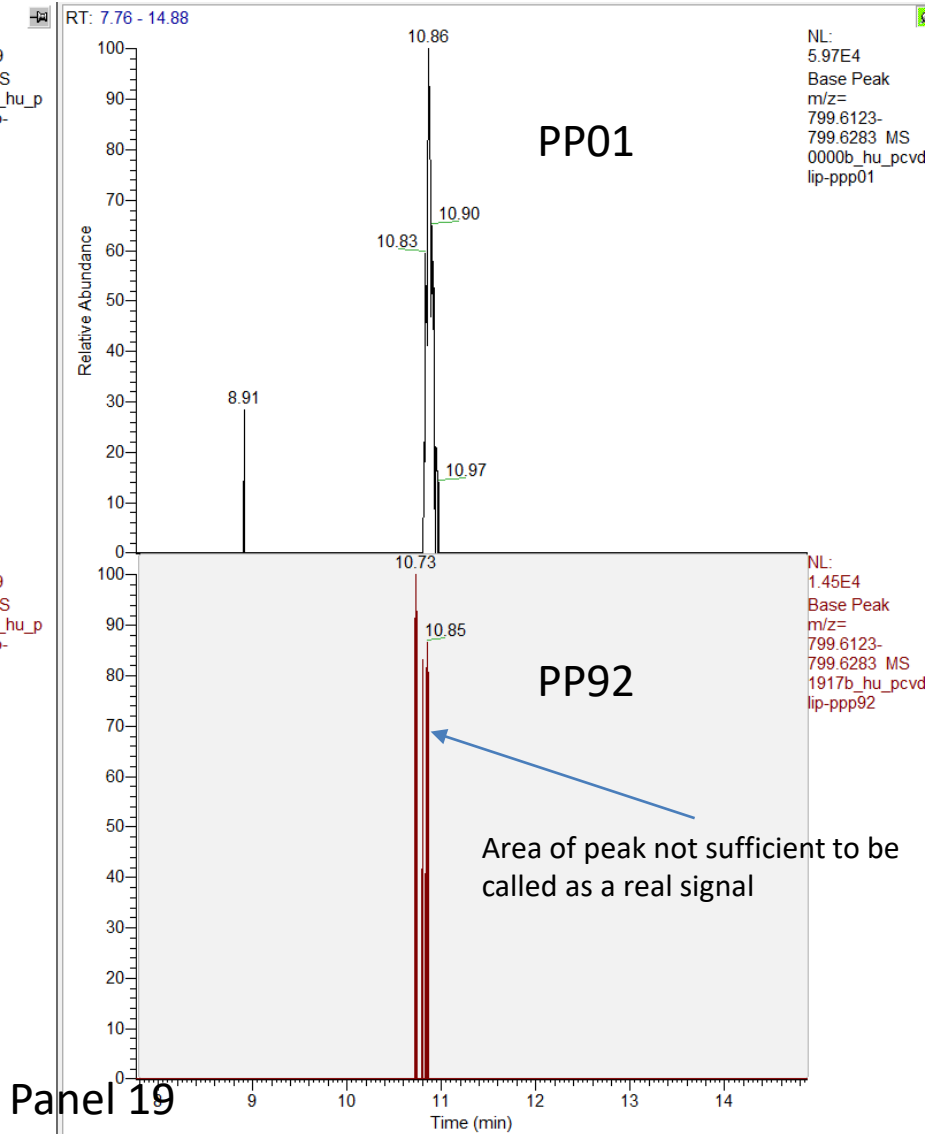

# a. Total Ion Chromatograms

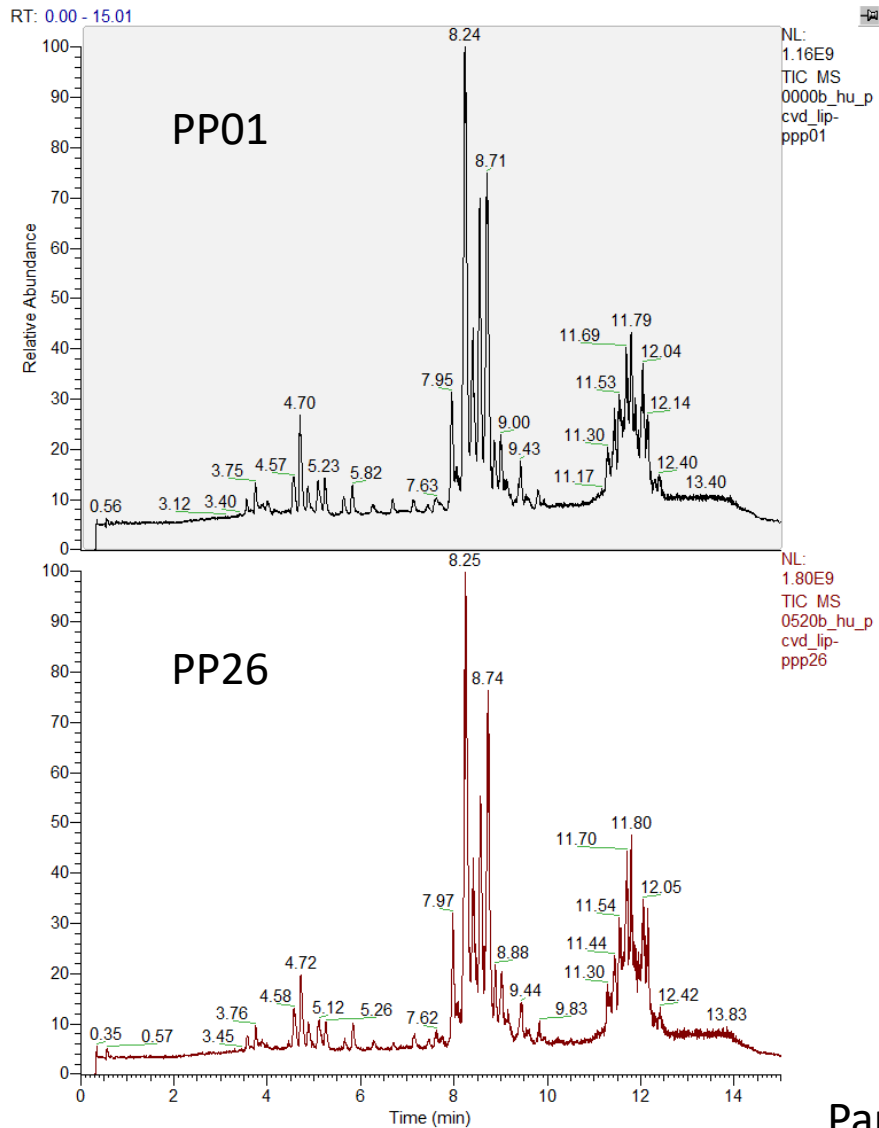

# b. Extracted Ion Chromatograms

QI6050 m/z 949.7796; RT 13.3

QI detected a peak on Pool 26, and not in Pool1 but both are background

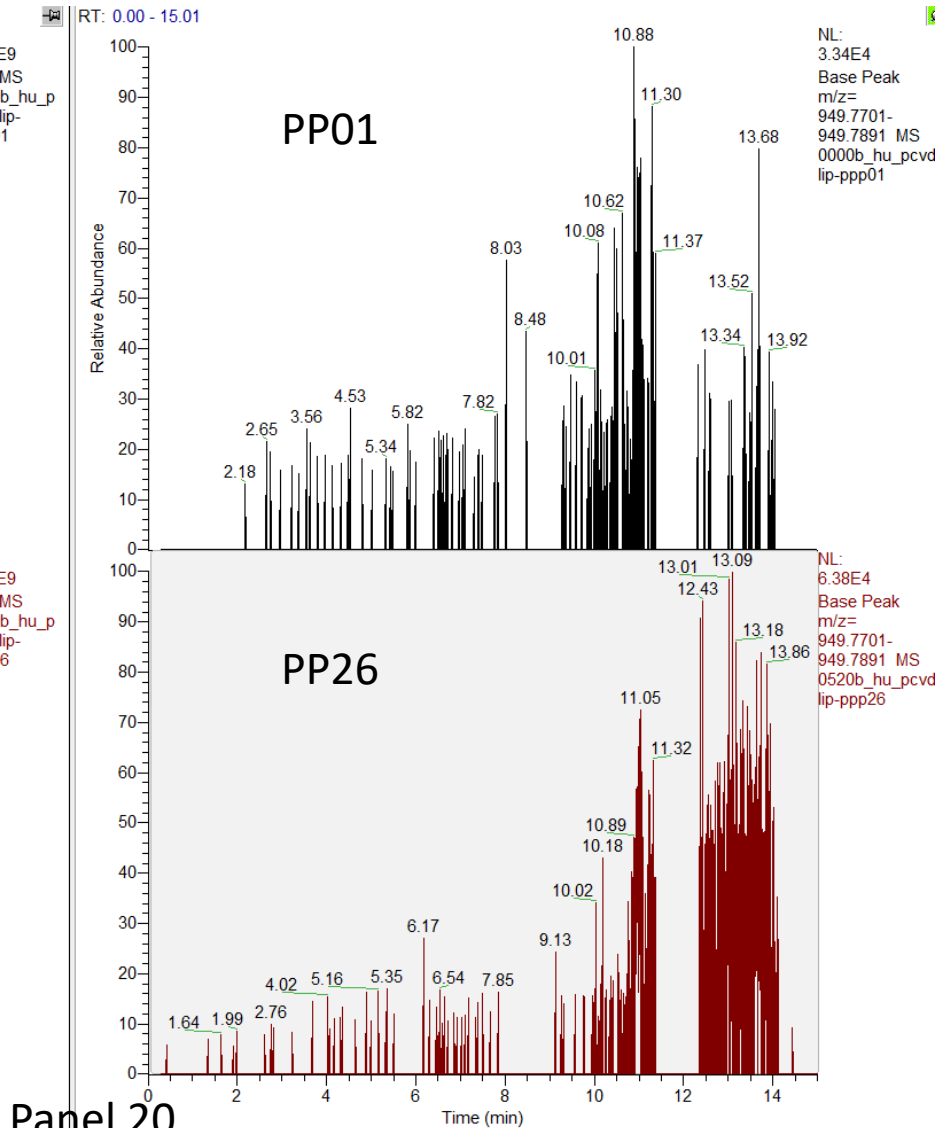

Supplement: NIHMS1791791-supplement-Figure_S1.pdf [file NIHMS1791791-supplement-Figure_S1.pdf]
